# Supplementary material for: Epigenome-Wide Meta-Analysis of Methylation in Children Related to Prenatal NO2 Air Pollution Exposure
Source: PubMed Central journal article supplement (PMC5226705; doi:10.1289/ehp36), 2016-07-22
Supplement: EHP36.s001.acco.pdf [file EHP36.s001.acco.pdf]

**Note to readers with disabilities:** *EHP* strives to ensure that all journal content is accessible to all readers. However, some figures and Supplemental Material published in *EHP* articles may not conform to [508 standards](#) due to the complexity of the information being presented. If you need assistance accessing journal content, please contact [ehp508@niehs.nih.gov](mailto:ehp508@niehs.nih.gov). Our staff will work with you to assess and meet your accessibility needs within 3 working days.

## **Supplemental Material**

### **Epigenome-Wide Meta-Analysis of Methylation in Children Related to Prenatal NO<sub>2</sub> Air Pollution Exposure**

Olena Gruzieva, Cheng-Jian Xu, Carrie V. Breton, Isabella Annesi-Maesano, Josep M. Antó, Charles Auffray, Stéphane Ballereau, Tom Bellander, Jean Bousquet, Mariona Bustamante, Marie-Aline Charles, Yvonne de Kluizenaar, Herman T. den Dekker, Liesbeth Duijts, Janine F. Felix, Ulrike Gehring, Mònica Guxens, Vincent V.W. Jaddoe, Soesma A. Jankipersadsing, Simon Kebede Merid, Juha Kere, Ashish Kumar, Nathanael Lemonnier, Johanna Lepeule, Wenche Nystad, Christian Magnus Page, Sviatlana Panasevich, Dirkje Postma, Rémy Slama, Jordi Sunyer, Cilla Söderhäll, Jin Yao, Stephanie J. London, Göran Pershagen, Gerard H. Koppelman, and Erik Melén

#### **Table of Contents**

##### **Materials and Methods**

**Table S1.** Characteristics of the included cohorts with available cord blood samples.

**Figure S1.** Plot of the cumulative distribution function for methylation intensities for the three top-ranked CpG sites.

**Figure S2.** Quantile-quantile plot (A) and Manhattan plot (B) for epigenome-wide meta-analysis of the association between NO<sub>2</sub> exposure during pregnancy and cord blood DNA methylation, additionally adjusted for cell type composition.

**Table S2.** Top 25 CpGs from the epigenome-wide meta-analysis of the association between NO<sub>2</sub> exposure during pregnancy and cord blood DNA methylation additionally adjusted for cell composition (n=1,508 newborns from MeDALL, Generation R, CHS and MoBa cohorts).

**Table S3.** Top 25 CpGs from the analysis of the association between NO<sub>2</sub> exposure during pregnancy and cord blood DNA methylation without adjustment for cell composition (left-side part) and with adjustment for cell composition according to Bakulski (right-side) (n=280 newborns from the MeDALL study).

**Table S4.** Look-up in older children for top 25 findings for prenatal NO<sub>2</sub> exposure in relation to methylation in meta-analysis of newborns.

**Table S5.** Look-up in 4-year-old children with paired cord blood and 4-year-old samples for top 25 findings for prenatal NO<sub>2</sub> exposure in relation to methylation in meta-analysis of newborns.

**Table S6.** Nominally significant CpGs within oxidative stress genes extracted from the epigenome-wide meta-analysis of the association between prenatal NO<sub>2</sub> exposure and newborn cord blood DNA methylation (n=1,508 newborns from MeDALL, Generation R, CHS and MoBa cohorts).

**Table S7.** All available CpGs mapped to *CAT* gene from the epigenome-wide meta-analysis of the association between NO<sub>2</sub> exposure during pregnancy and newborn cord blood DNA methylation (N=1,508 newborns from MeDALL, Generation R, CHS and MoBa cohorts).

**Table S8.** All available CpGs mapped to *TPO* gene from the epigenome-wide meta-analysis of the association between NO<sub>2</sub> exposure during pregnancy and newborn cord blood DNA methylation (N=1,508 newborns from MeDALL, Generation R, CHS and MoBa cohorts).

**Table S9.** Look-up in older children for top CpGs in the *CAT* and *TPO* genes for prenatal NO<sub>2</sub> exposure in relation to methylation in meta-analysis of newborns (n=1,508).

**Figure S3.** Regional plots and co-methylation patterns for the genes containing FDR-significant EWAS CpG sites.

## **Acknowledgments**

## **Funding**

## **Materials and Methods**

### **MeDALL**

MeDALL (Mechanisms of the Development of ALLergy) is a collaborative project supported by the European Union under the Health Cooperation Work Programme of the 7th Framework programme (grant agreement number 261357) (Bousquet et al. 2011). MeDALL epigenetics studies include four birth cohorts. These are EDEN, BAMSE, PIAMA and INMA.

#### **MeDALL – EDEN**

The EDEN (Etude des Déterminants pré et post natals du développement et de la santé de l'Enfant) study is a prospective Birth Cohort Study (<https://eden.vjf.inserm.fr/>), which has been described in detail elsewhere (Heude et al. 2015). Pregnant women seen for a prenatal visit at the departments of Obstetrics and Gynecology of the University Hospital of Nancy and Poitiers before their twenty-fourth week of amenorrhea were invited to participate. Enrolment started in February 2003 in Poitiers and September 2003 in Nancy; it lasted 27 months in each centre. Among eligible women, 55% (2002 women) accepted to participate. The study has been approved by the ethical committees « Comité Consultatif pour la Protection des Personnes dans la Recherche Biomédicale », Le Kremlin-Bicêtre University hospital, and « Commission Nationale de l'Informatique et des Libertés ».

#### **MeDALL - INMA**

The INMA—Infancia y Medio Ambiente—(Environment and Childhood) Project is a network of birth cohorts in Spain that aim to study the role of environmental pollutants in air, water and diet during pregnancy and early childhood in relation to child growth and development (Guxens et al. 2012). The study has been approved by Ethical Committee of each participating centre and written consent was obtained from participating parents. Data for this study came from INMA Sabadell cohort (children born between 2004 and 2007). A total of 187 mothers with prenatal air pollution information and offspring cord blood DNA methylation were included, as well as 195 samples at age 4 years.

#### **MeDALL - PIAMA**

For the PIAMA birth cohort study, pregnant women were recruited in 1996-1997 during their second trimester of pregnancy from a series of communities in the North, West, and Centre of The Netherlands as described elsewhere (Wijga et al. IJE 2014). Non-allergic pregnant women were invited to participate in a “natural history” study arm. Pregnant women identified as allergic through a validated screening questionnaire were primarily allocated to

an intervention arm with a random subset allocated to the natural history arm. The intervention involved the use of mite-impermeable mattress and pillow covers. The study started with 3,963 newborns. Information on the children's health, socio-demographic and lifestyle factors as well as residential characteristics was collected by questionnaire annually until age 8 years and then at ages 11 and 14 years.

### **MeDALL – BAMSE**

BAMSE is a prospective population-based cohort study of children recruited at birth and followed during childhood and adolescence. Details of the study design, inclusion criteria, enrolment and data collection are described elsewhere (Thacher et al. 2016; Wickman et al. 2002). In short, 4,089 children born between 1994 and 1996 in four municipalities of Stockholm County were enrolled. At baseline, when the infant was approximately 2 months of age, parents completed a questionnaire that assessed residential characteristics, as well as socioeconomic and lifestyle factors. When children were 1, 2, 4, 8, 12 and 16 years, the parents completed questionnaires focusing on children's symptoms related to wheezing and allergic diseases, as well as various exposures. The survey response rates were 96%, 94%, 91%, 84%, 82% and 78%, respectively. Furthermore, blood was obtained at ages 4, 8 and 16 years from 2,605 (63.7%), 2,470 (60.4%) and 2,547 (62.2%) children, respectively. The baseline and follow-up studies were approved by the Regional Ethical Review Board, Karolinska Institutet, Stockholm, Sweden, and the parents of all participating children provided informed consent.

#### *MeDALL DNA methylation measurements*

In the MeDALL study, peripheral blood samples were collected from all consenting cohort participants, and DNA from peripheral and cord blood samples was extracted using the QIAamp blood kit (Qiagen, Inc, Valencia, CA) or equivalent protocols, followed by a precipitation-based concentration using GlycoBlue (Ambion, Austin, Tex). DNA concentration was determined by Nanodrop measurement and picogreen quantification. 500 ng of DNA were bisulfite-converted using the EZ 96-DNA methylation kit following the manufacturer's standard protocol, and DNA methylation measured using the Illumina Infinium HumanMethylation450 beadchip (Illumina, Inc., San Diego, USA). DNA methylation data were preprocessed using the Minfi package (Aryee et al. 2014).

In quality control, samples that did not provide significant methylation signals in more than 10% of probes (detection p-value=0.01) were regarded as bad quality samples and were directly removed. In addition, samples were excluded in case of low staining efficiency, low single base extension efficiency, low stripping efficiency of DNA from probes after single base extension, poor hybridization performance, poor bisulfite conversion and high negative control probe staining. Moreover, we used 65 SNP probes to check for concordances between paired DNA samples from the sample individual and assessed the methylation distribution of X-chromosome to verify gender. Paired samples which show Pearson correlation coefficient <0.9 were regarded as sample mixed ups and were excluded from the study. Furthermore, we excluded probes on sex chromosomes, probes that mapped on multi-loci, the 65 random SNPs assay, and probes that contained SNP(s) at the target CpG sites with a minor allele frequency >10% . A series of steps were completed for quality control and data analysis. First, we implemented sample filtering to remove bad quality and mixed up samples. Second, we filtered out the probes to remove the CpG sites which are not mapped to unique location on the genome and CpGs containing single nucleotide polymorphisms (SNPs) at the target site. Third, we implemented “DASEN” (Pidsley et al. 2013) to perform signal correction and normalization.

To remove bias in methylation profiles unrelated to underlying biological processes, we implemented a correction procedures based on 613 negative control probes presented in 450K arrays since these negative control probes are supposed to not relate to biological variation. Finally, we implemented principal component analysis (PCA) on control probes data, then, we performed 10000 permutation for controls probes data and selected principal components with p-value defined as to get the p-value of  $(\text{number of var}(\text{random pc}) > \text{var}(\text{pc})) / (\text{number of permutations}) < 10^{-4}$ . The methylation data for each CpG are thus the residuals from a linear model fitting incorporating the significant 5 PCs.

#### *MeDALL gene expression measurements*

Data on mRNA gene expression were available in the BAMSE (239 children aged 16 years) and the INMA (111 children aged 4 years) cohorts. Whole blood was collected in PAXGene tubes and RNA was extracted using PAXgene Blood RNA kit (QIAGEN, Courtaboeuf, France). Quantity of extracted RNA and quality assessment were performed with Dropsense96 (Trinean, Gentbrugge, Belgium) and TapeStation (Agilent, Les Ulis, France) instruments, respectively, discarding 3 samples (BAMSE n=2, INMA n=1). RNA of

highest quality was selected for amplification, labeling and hybridization on Affymetrix HTA 2.0 Genechips using Affymetrix IVT kit (Affymetrix, Inc. USA) at the European Institute for Systems Biology and Medicine in Lyon. Data were then processed at the probesets level for RMA normalization using Expression Console Software from Affymetrix v1.4. Expression transcripts were annotated using version 35 of Affymetrix annotation. In the INMA cohort, 12 samples were excluded because they were outliers defined as more than 3SD from the mean for PC1 or PC2 (n=8) or there were sex discrepancies (n=8). The Affy HTA 2.0 technology we used is composed of 428, 250, 328, 242, 80 and 126 probes for the *TPO*, *CAT*, *LONPI*, *SLC25A28*, *PLVAP* and *GPR55*, respectively. Each of these sets contains probes that are scattered at various localization along the transcripts, including exons and junctions, averaged into one Transcript Cluster (per gene) summarizing the specific gene expression level. For the BAMSE samples, automated cell count was obtained by flow cytometry performed at the Karolinska University Laboratory in Stockholm, Sweden.

### **BAMSE EpiGene**

In the BAMSE cohort we also had an independent methylation dataset. Epigenome-wide DNA methylation was measured in 472 Caucasian children, using DNA extracted from blood samples collected at the age of 8 years. An aliquot (500 ng) of DNA per sample underwent bisulfite conversion using the EZ-96 DNA Methylation kit (Zymo Research Corporation, Irvine, USA). Samples were plated onto 96-well plates in randomized order. Samples were processed with the Illumina Infinium HumanMethylation450 BeadChip (Illumina Inc., San Diego, USA).

Quality control of analysed samples was performed using standardized criteria. Samples were excluded in case of sample call rate <99%, colour balance >3, low staining efficiency, poor extension efficiency, poor hybridization performance, low stripping efficiency after extension and poor bisulfite conversion. We also applied multidimensional scaling (MDS) plot to evaluate gender outliers based on chromosome X data, that produced two separated clusters for male and female. We omitted 5 samples that do not belong to the distinct cluster. Furthermore, we applied median intensity plot for methylated and unmethylated intensity by using the minfi R package (3 samples below the 10.5 cutoff were excluded). All above led to exclusion of 8 samples.

Probes with a single nucleotide polymorphism in the single base extension site with a frequency of >5% were excluded (Chen et al. 2013), as were probes with non-optimal binding (non-mapping or mapping multiple times to either the normal or the bisulphite-converted genome), and the probed belonging to chrX and ChrY, resulting in the exclusion of 46,799 probes, leaving a total of 438,713 probes in the analysis.

Furthermore, we implemented “DASEN” recommended from wateRmelon package to do signal correction and normalization (Pidsley et al. 2013).

### **The Generation R Study**

The Generation R Study is a population-based prospective cohort study from fetal life onwards in Rotterdam, the Netherlands, which has been previously described in detail (Jaddoe et al. 2012). Assessments in pregnant women consisted of physical examinations, fetal ultrasounds, biological samples, and questionnaires (Kruithof et al. 2014). All children were born between April 2002 and January 2006. The study has been approved by the Medical Ethical Committee of the Erasmus University Medical Centre and written consent was obtained for all participating mothers and children. For the current study, data was available for 809 Caucasian mothers and their children with information on NO<sub>2</sub> exposure during pregnancy and DNA-methylation at birth.

#### *Generation R DNA methylation measurements*

DNA was extracted from cord blood samples of 979 Caucasian children. Using the EZ-96 DNA Methylation kit (Shallow-well, Zymo Research Corporation, Irvine, USA), 500 ng DNA per sample underwent bisulfite conversion. Samples were transferred onto 96-well plates in a random order. Samples were processed with Illumina’s Infinium HumanMethylation450 BeadChip (Illumina Inc., San Diego, USA). Quality control of analyzed samples was performed using standardized criteria. Samples were excluded due to sample call rate <99% (n=7) or poor bisulfite conversion (n=1). In addition, 2 samples were excluded because of a gender mismatch and 1 sample because of a retracted informed consent, leaving a total of 969 samples in the statistical analysis.

Probes with a single nucleotide polymorphism in the single base extension site with a frequency of >1% in the GoNLv4 reference panel were excluded, as were probes with non-optimal binding (non-mapping or mapping multiple times to either the normal or the

bisulphite-converted genome), resulting in the exclusion of 49,564 probes, leaving a total of 436,013 probes in the analysis.

Data were normalized with DASES normalization using a pipeline adapted from that developed by Touleimat and Tost (Touleimat and Tost 2012). DASES normalization includes background adjustment, between-array normalization applied to type I and type II probes separately, and dye bias correction applied to type I and type II probes separately. DASES is based on the DASEN method, but adds the dye bias correction, which is not included in DASEN (Pidsley et al. 2013). Beta-values were calculated for all CpG sites.

#### *Air pollution exposure assessment in MeDALL, the Generation R Study and BAMSE EpiGene*

The procedures for measurements and LUR modeling have been extensively described elsewhere (Pedersen et al. 2013; Van den Hooven et al. 2012). In short, 40 sampling sites (80 in the Netherlands/Belgium) for NO<sub>2</sub> and other agents were selected in each study area to characterize the spatial distribution of the cohort addresses, including regional background, urban background, and traffic sites. Measurements were performed at each site 3 times during 2 weeks in the cold, warm, and intermediate seasons, and the results were averaged to estimate the annual average. LUR models for NO<sub>2</sub> were developed based on measured annual average concentrations by using a range of Geographic Information System–derived predictor variables selected through a supervised stepwise procedure. Modeling was done locally at each center according to a common exposure assessment manual (<http://www.escapeproject.eu/manuals/>) following harmonized procedures regarding air pollutants measurements, development of land use regression models, and validation (Beelen et al. 2013). For the present analyses, total NO<sub>2</sub> exposure averaged throughout entire pregnancy was used. Data from routine monitoring stations were used to temporally adjust the LUR estimates to the periods corresponding to each individual pregnancy. The current exposure was estimated by assignment of modeled annual average NO<sub>2</sub> concentrations to the current addresses at the time when the blood samples were collected.

#### **Children’s Health Study (CHS)**

CHS is a population-based prospective cohort study from age 6 onwards in Southern California, which has been described in detail elsewhere (McConnell et al. 2006). The study protocol was approved by the University of Southern California Institutional Review Board



and informed, written consent and assent were provided by the parents and children respectively.

A total of 5,341 children were recruited from schools within several Southern California communities, all of whom were born between 1995 and 1997 and are currently being followed until age 18. The cohort was established with the purpose of investigating the effects of air pollutants on respiratory health in children. Personal, parental, and socio-demographic characteristics were obtained by parent-completed questionnaire. Birth weight, gestational age, mode of delivery and other reproductive data were obtained from California birth records. The estimated date of conception was assigned using the birth date and gestational age, corrected for the average 2-week difference between the last menstrual period and conception. Ancestry (European, African, and Asian) was measured using ancestry informative markers SNPs and included as an additional covariate.

#### *CHS DNA methylation measurements*

Epigenome-wide DNA methylation was measured in 226 Hispanic and non-Hispanic white children, using DNA extracted from newborn bloodspots archived by the state of California. Laboratory personnel performing DNA methylation analysis were blinded to study subject information. DNA was extracted whole blood cells using the QiaAmp DNA blood kit (Qiagen Inc, Valencia, CA) and stored at -80 degrees Celcius. 700-1000ng of genomic DNA from each sample was treated with bisulfite using the EZ-96 DNA Methylation Kit™ (Zymo Research, Irvine, CA, USA), according to the manufacturer's recommended protocol and eluted in 18 ul. The results of the Infinium HumanMethylation450 BeadChip (HM450) were compiled for each locus as previously described and were reported as beta ( $\beta$ ) values (Noushmehr et al. 2010).

CpG loci on the HM450 array were removed from analyses if they were on the X and Y chromosomes, or if they contained SNPs, deletions, repeats, or if they have more than 10% missing values. Data were processed in the methylumi package in R, after which a normal exponential background correction was applied to the raw intensities at the array level to reduce background noise (Triche et al. 2013). We then normalized each sample's methylation values to have the same quantiles to address sample to sample variability (Bolstad et al. 2003).  $\beta$ -values were calculated for all CpG sites.

#### *CHS air pollution exposure assessment*

The CHS air quality monitoring data (Peters et al. 1999a; Peters et al. 1999b) and the US EPA air Quality System were used to assign estimates of prenatal air pollution exposures for NO<sub>2</sub>, based on a combination of residential history obtained from parents when subjects were 6-7 years old and birth address recorded on the birth certificate. In all but 34 cases, questionnaire-reported birth address from the residential history matched the birth address from the birth certificate. In the 34 cases where a mismatch was identified, the birth certificate address was used to assign air pollution exposure. Moreover, the birth address was representative of the mother's location throughout pregnancy in 88% of the subjects.

Addresses were geocoded using TeleAtlas Inc.'s Address Point Geocoding Services. Station-specific air quality data were spatially interpolated to each birth residence using inverse-distance-squared weighting (Hannam et al. 2013; Rivera-Gonzalez et al. 2015). The data from up to four air quality measurement stations were included in each interpolation with a maximum interpolation radius of 50 km. However, when a residence was located within 5 km of one or more stations with valid observations, the interpolation was based solely on the nearby values. Prenatal ambient air pollution concentrations were estimated for each subject's reported birth residence based on average monthly air pollutant exposure data. A leave one out evaluation of the spatial mapping method produced an  $r^2=0.73$ , for monthly NO<sub>2</sub> concentrations using data from California.

### **The Norwegian Mother and Child Cohort (MoBa)**

MoBa is a prospective population-based pregnancy cohort study conducted by the Norwegian Institute of Public Health (Magnus et al. 2006; Ronningen et al. 2006). Participants were recruited from all over Norway from 1999-2008. The women consented to participation in 40.6% of the pregnancies. The cohort includes about 114,500 children, 95,200 mothers and 75,200 fathers. Blood samples were obtained from both parents during pregnancy and from mothers and children (umbilical cord) at birth. Data from MoBa was linked to the Medical Birth Registry of Norway (MBRN), and the current study used information from follow-up questionnaires at approximately 18-, and 30 - gestational weeks. DNA methylation and information on NO<sub>2</sub> exposure were available on 193 pregnancies. MoBa has obtained a licence from the Norwegian Data Inspectorate, and the current study was approved by The Regional Committee for Medical Research Ethics

### *MoBa DNA methylation measurements*

Details on the DNA methylation and quality control can be found in (Joubert et al. 2016).

### *MoBa air pollution exposure assessment*

Estimating air pollution exposure during pregnancy (including NO<sub>2</sub> measurements, LUR models development, and validation) was based on the methodology developed for the ESCAPE project (Beelen et al. 2013; Pedersen et al. 2013). LUR models for NO<sub>2</sub> levels were built for the studied areas in order to account for regional specifics. In the models we used air pollution measurements conducted in 2010 for Oslo and Akershus, and in 2011 for Bergen and Hordaland. Measurement campaigns included three rounds of approximately two weeks duration with NO<sub>2</sub> measurements (during winter, summer and an intermediate season) within a one year period. Measurement sites were selected to represent the range of residential exposure for each study area. For the analysis we included sites with no missing data, and no geocoding mismatches. LUR-modelled NO<sub>2</sub> yearly mean estimates for residential addresses at birth were temporally adjusted for each individual pregnancy using continuous routine monitoring station data. Daily NO<sub>2</sub> exposure estimates were averaged over the whole pregnancy.

**Table S1. Characteristics of the included cohorts with available cord blood samples**

| Cohort characteristics               | MeDALL cohorts                                       |                                                                      |                                                                 |                                                                                                    | CHS                                                                                                                      | Generation R                              | MoBa                          |
|--------------------------------------|------------------------------------------------------|----------------------------------------------------------------------|-----------------------------------------------------------------|----------------------------------------------------------------------------------------------------|--------------------------------------------------------------------------------------------------------------------------|-------------------------------------------|-------------------------------|
|                                      | BAMSE                                                | EDEN                                                                 | INMA                                                            | PIAMA                                                                                              |                                                                                                                          |                                           |                               |
| Study design                         | Population based birth cohort.                       | Population based birth cohort, enrolled before 26 weeks of pregnancy | Population based birth cohort, enrolled at week 12 of pregnancy | Population based birth cohort (with mattress cover intervention and allergic/non-allergic parents) | Population-based children's cohort with retrospective collection of residential history, and archived newborn bloodspots | Population-based prospective birth cohort | Population based birth cohort |
| Age at enrolment                     | Newborns                                             | Pregnant women                                                       |                                                                 | Pregnant women                                                                                     | 5-6 years                                                                                                                | Pregnant women                            | Pregnant women                |
| Population source (area)             | Stockholm, Sweden                                    | Nancy and Poitiers, France                                           | Sabadell, Spain                                                 | North, West and center of the Netherlands                                                          | Greater Los Angeles area                                                                                                 | Rotterdam, the Netherlands                | Norway                        |
| Enrolment period                     | 1994-1996                                            | 2003-2006                                                            | 2004-2007                                                       | 1996-1997                                                                                          | 2002                                                                                                                     | 2002-2006                                 | 1999-2008                     |
| Cohort recruitment                   | Community population register                        | Prenatal Healthcare                                                  | Prenatal healthcare                                             | Prenatal healthcare                                                                                | Community schools                                                                                                        | Prenatal healthcare                       | Prenatal healthcare           |
| Total number of recruited children   | 4,089                                                | 2,002                                                                | 638                                                             | 3,963                                                                                              | 5341                                                                                                                     | 9,901                                     |                               |
| Follow-up time points (year of life) | 1,2,4,8                                              | Birth, 4 and 8 months, 1, 2, 3, 4, 5-6, 8 years                      | Birth, 1, 2, 4, 7, 9                                            | 1,2,3,4,5,6,7,8, 11,14                                                                             | 6-18                                                                                                                     |                                           | Birth, 0.5, 1.5, 3, 5, 7      |
| <b>Traffic air pollution</b>         |                                                      |                                                                      |                                                                 |                                                                                                    |                                                                                                                          |                                           |                               |
| Estimation model                     | LUR                                                  | LUR                                                                  | LUR                                                             | LUR                                                                                                | Dispersion                                                                                                               | LUR                                       | LUR                           |
| Time of measurements                 | 2009                                                 | 2002, 2005                                                           | 2010                                                            | 2009                                                                                               | 1995-1996                                                                                                                | 2002-2006                                 | 2010, 2011                    |
| <b>Sample selection</b>              |                                                      |                                                                      |                                                                 |                                                                                                    |                                                                                                                          |                                           |                               |
| Criteria for selection of sample     | 4yr – 8yr paired DNA samples.<br>Asthma case-control | Birth-5yr paired DNA samples.                                        | Birth-4yr paired DNA samples.<br>Asthma case-control            | 4yr – 8yr paired DNA samples.<br>Asthma case-control                                               | Randomly selected from within subjects that matched to CA birth records and had a bloodspot                              | European ancestry                         |                               |

|                                     |                     |                     |                     |                     |                                       |                     |                     |
|-------------------------------------|---------------------|---------------------|---------------------|---------------------|---------------------------------------|---------------------|---------------------|
| Methylation measurement platform    | Illumina 450K assay | Illumina 450K assay | Illumina 450K assay | Illumina 450K assay | Illumina 450K assay                   | Illumina 450K assay | Illumina 450K assay |
| Number of CpGs available per cohort | 439,306             | 439,306             | 439,306             | 439,306             | 368,386                               | 436,013             | 473,731             |
| Ethnicity                           | Caucasian           | Caucasian           | Caucasian           | Caucasian           | Hispanic white and non-Hispanic white | Caucasian           | Caucasian           |

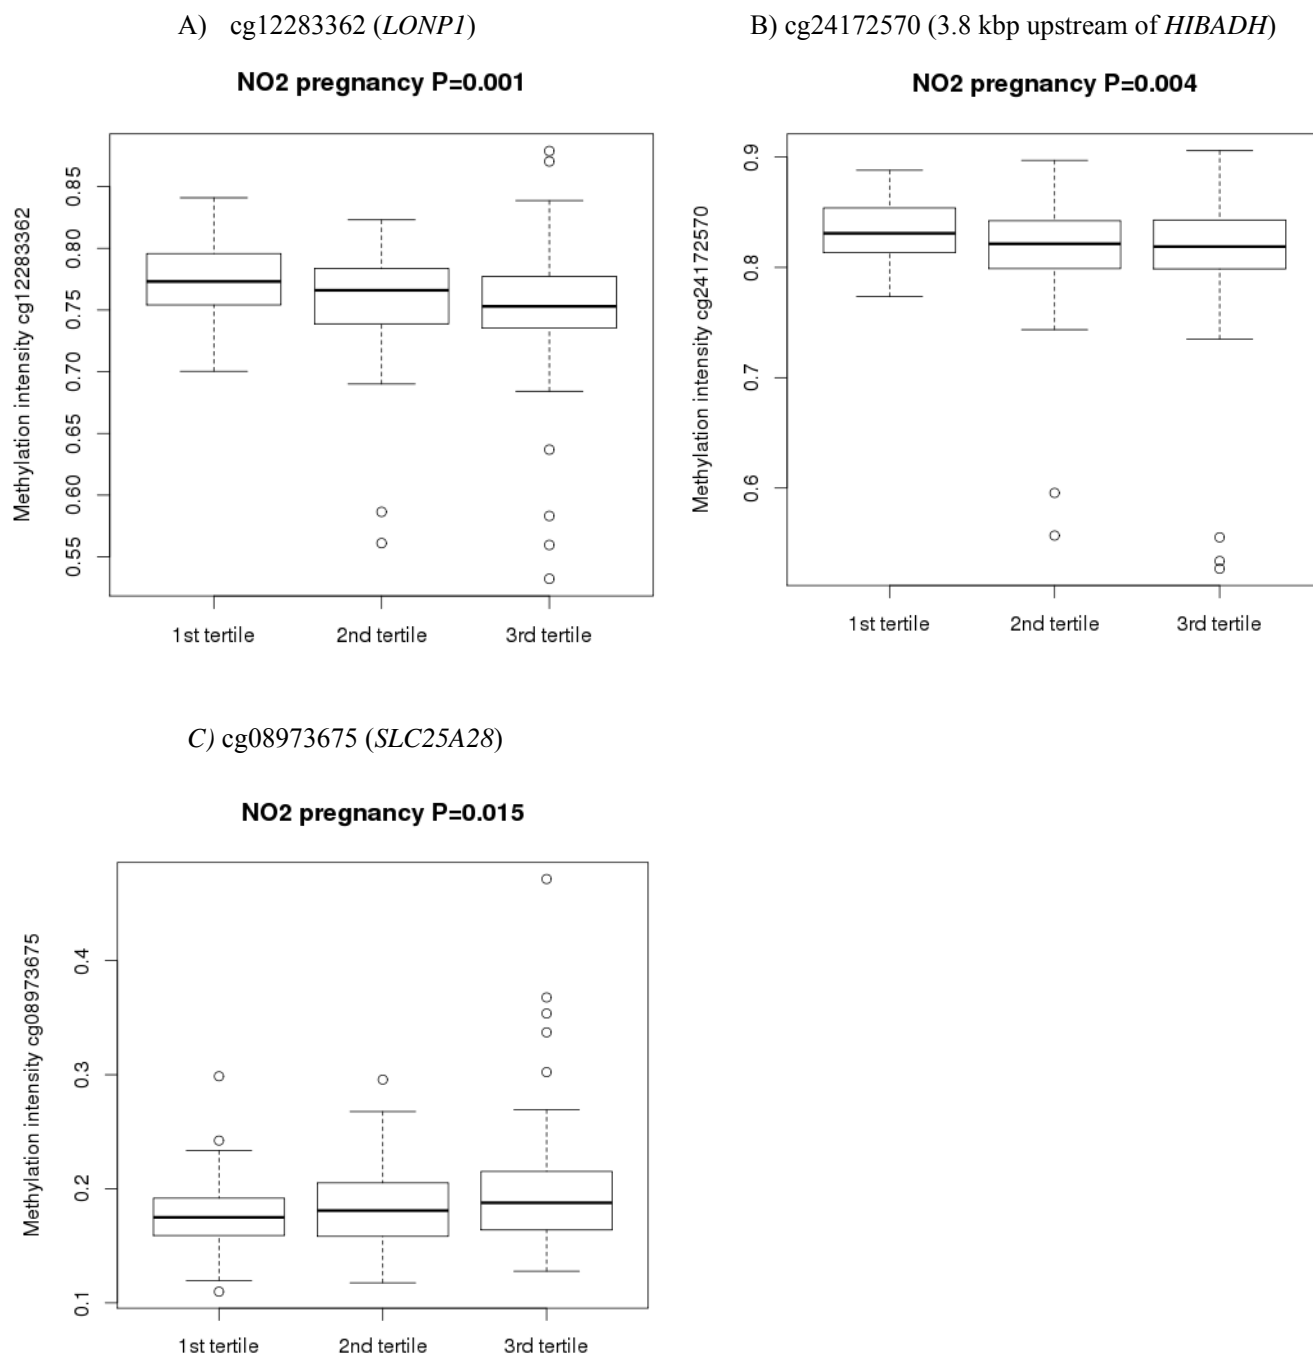

**Figure S1.** Plot of the cumulative distribution function for methylation intensities for the three top-ranked CpG sites: cg12283362 (*LONPI*), cg24172570 (3.8 kbp upstream of *HIBADH*), and cg08973675 (*SLC25A28*) by the cohort-specific tertiles of prenatal NO<sub>2</sub> exposure (in the INMA cohort, 1<sup>st</sup> tertile <39.9  $\mu\text{g}/\text{m}^3$ ; 2<sup>nd</sup> tertile 39.9-47.6  $\mu\text{g}/\text{m}^3$ ; 3<sup>rd</sup> tertile >47.6  $\mu\text{g}/\text{m}^3$ ; in the EDEN cohort, 1<sup>st</sup> tertile <12.7  $\mu\text{g}/\text{m}^3$ ; 2<sup>nd</sup> tertile 12.7-17.6  $\mu\text{g}/\text{m}^3$ ; 3<sup>rd</sup> tertile >17.6  $\mu\text{g}/\text{m}^3$ ) demonstrates a statistically significant dose-response effect of exposure in the INMA and EDEN cohorts. The p-values are derived from the Jonckheere-Terpstra trend test, calculated using the SAGx package in R, version 2.14.0.

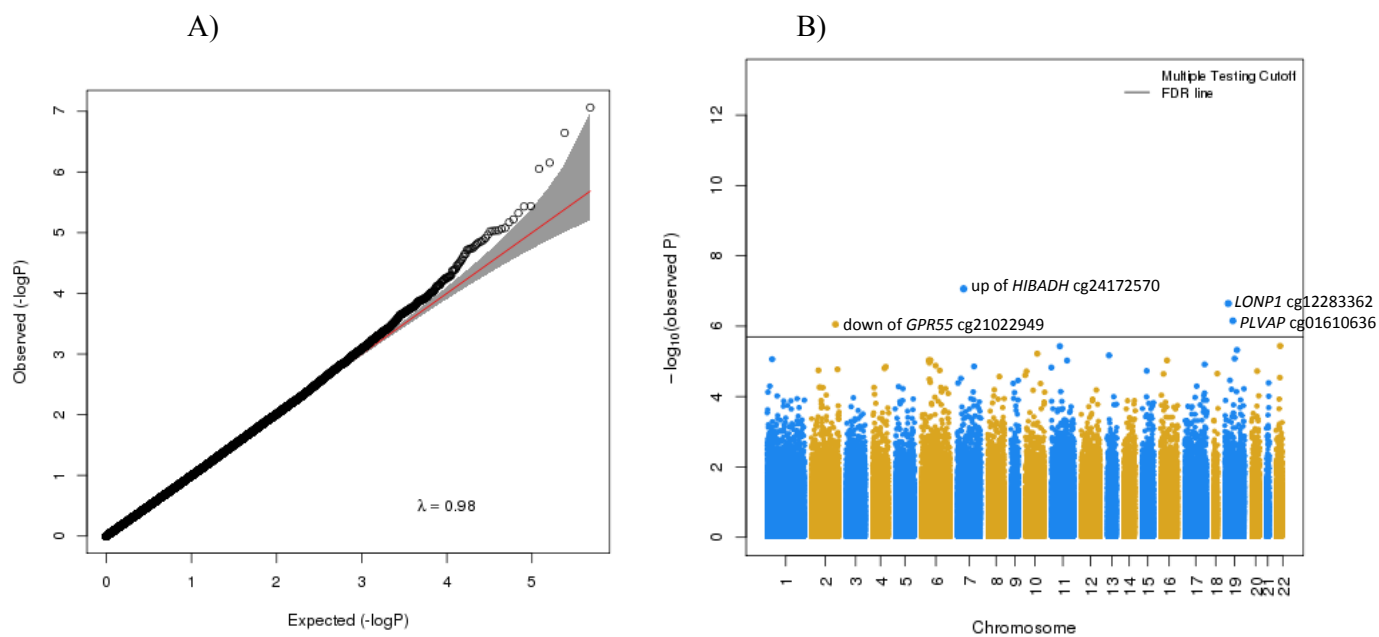

**Figure S2.** Quantile-quantile plot (A) and Manhattan plot (B) for epigenome-wide meta-analysis of the association between NO<sub>2</sub> exposure during pregnancy and cord blood DNA methylation, additionally adjusted for cell type composition (n=1,508). Four CpGs were considered statistically significant using FDR correction (solid horizontal line): cg24172570 3.8 kbp upstream of *HIBADH*, cg12283362 in *LONP1*, cg01610636 in *PLVAP*, and cg21022949 19.7 kbp downstream of *GPR55*.

**Table S2.** Top 25 CpGs from the epigenome-wide meta-analysis of the association between NO<sub>2</sub> exposure during pregnancy and cord blood DNA methylation additionally adjusted for cell composition (n=1,508 newborns from MeDALL, Generation R, CHS and MoBa cohorts).

| Chr | Position (build 37) | CpG        | Mapped gene                | Gene group     | Coef   | SE       | P-value  | Direction |
|-----|---------------------|------------|----------------------------|----------------|--------|----------|----------|-----------|
| 7   | 27561178            | cg24172570 | <i>HIBADH</i> * <i>FDR</i> |                | -0.004 | 8.00E-04 | 8.65E-08 | --?-      |
| 19  | 5709149             | cg12283362 | <i>LONP1</i> <i>FDR</i>    | Body           | -0.007 | 1.30E-03 | 2.27E-07 | -??-      |
| 19  | 17463255            | cg01610636 | <i>PLVAP</i> <i>FDR</i>    | Body           | -0.005 | 9.00E-04 | 7.03E-07 | ----      |
| 2   | 231809697           | cg21022949 | <i>GPR55</i> * <i>FDR</i>  |                | 0.001  | 2.00E-04 | 8.86E-07 | ++++      |
| 22  | 40355732            | cg17988310 | <i>GRAP2</i>               | Body           | 0.004  | 8.00E-04 | 3.65E-06 | ++++      |
| 11  | 47400146            | cg03565868 | <i>SPI1</i>                | TSS200         | 0.005  | 1.10E-03 | 3.71E-06 | +++-      |
| 19  | 39884218            | cg14651844 | <i>MED29</i>               | Body           | 0.002  | 5.00E-04 | 4.75E-06 | +--+      |
| 10  | 101380289           | cg08973675 | <i>SLC25A28</i>            | TSS200         | 0.005  | 1.10E-03 | 6.05E-06 | +++-      |
| 13  | 32524761            | cg00648883 | <i>EEF1DP3</i>             | Body           | 0.006  | 1.30E-03 | 6.77E-06 | ++++      |
| 19  | 30155866            | cg05512099 | <i>PLEKHF1</i>             | TSS1500        | -0.007 | 1.60E-03 | 8.36E-06 | -+?-      |
| 1   | 9675560             | cg25590444 | <i>TMEM201</i> *           |                | 0.003  | 6.00E-04 | 8.67E-06 | +--+      |
| 6   | 31382102            | cg26504614 | <i>MICA</i>                | Body           | -0.005 | 1.10E-03 | 9.25E-06 | -?--      |
| 6   | 30524763            | cg03860665 | <i>PRR3</i>                | 5'UTR; 1stExon | 0.002  | 4.00E-04 | 9.27E-06 | ++++      |
| 16  | 27325254            | cg06641959 | <i>ILAR</i>                | 5'UTR; 1stExon | 0.002  | 4.00E-04 | 9.38E-06 | ++++      |
| 11  | 74871202            | cg12537437 | <i>SLCO2B1</i>             | Body; 5'UTR    | -0.003 | 7.00E-04 | 9.47E-06 | ---+      |
| 6   | 30689865            | cg25742745 | <i>TUBB</i>                | Body           | 0.004  | 1.00E-03 | 1.09E-05 | +??+      |
| 17  | 78926091            | cg21831512 | <i>RPTOR</i>               | Body           | 0.004  | 8.00E-04 | 1.22E-05 | +--+      |
| 6   | 33359817            | cg04757012 | <i>KIFC1</i>               | Body           | 0.001  | 3.00E-04 | 1.33E-05 | ++++      |
| 7   | 117824040           | cg08301459 | <i>NAA38</i>               | TSS200         | 0.002  | 3.00E-04 | 1.39E-05 | ++?+      |
| 4   | 154386136           | cg21908828 | <i>KIAA0922</i>            | TSS1500        | 0.004  | 1.00E-03 | 1.42E-05 | ++++      |
| 11  | 369155              | cg19787465 | <i>B4GALNT4</i>            | TSS1500        | 0.004  | 8.00E-04 | 1.49E-05 | +++-      |
| 4   | 139940407           | cg04702527 | <i>CCRN4L</i>              | Body           | -0.005 | 1.20E-03 | 1.58E-05 | -+?-      |
| 2   | 239984105           | cg09155776 | <i>HDAC4</i>               | Body           | -0.010 | 2.30E-03 | 1.69E-05 | ----      |
| 2   | 60698937            | cg04588436 | <i>BCL11A</i>              | Body           | -0.003 | 8.00E-04 | 1.80E-05 | -??-      |
| 6   | 56114591            | cg11241549 |                            |                | 0.007  | 1.50E-03 | 1.81E-05 | +??+      |

Shown are top 25 CpGs ordered by p-value; All results presented per 10 µg/m<sup>3</sup> increase in prenatal NO<sub>2</sub> exposure. Column headers: CHR: chromosome; Position: Chromosomal position based on NCBI human reference genome assembly Build 37. Mapped Gene: UCSC annotated gene; Gene Group: UCSC gene region feature category; regression coefficient; SE: standard error for regression coefficient; Direction: Direction of effect across cohorts included in the statistical model (MeDALL, Generation R, CHS and MoBa): NO<sub>2</sub> exposure during pregnancy associated with increased (+) or decreased (-) methylation, or missing (?) result. Genome-wide significance threshold (FDR p<0.05).

\*cg24172570 is located 3.8 kbp upstream of *HIBADH*; cg21022949 – 19.7 kbp downstream of *GPR55*; cg25590444 - 0,6 kbp downstream of *TMEM201*.



\*\* Data on methylation of cg12283362 was available in 473 individuals, cg24172570 - in 1282 individuals.

**Table S3.** Top 25 CpGs from the analysis of the association between NO<sub>2</sub> exposure during pregnancy and cord blood DNA methylation without adjustment for cell composition (upper part) and with adjustment for cell composition according to Bakulski (lower part) (n=280 newborns from the MeDALL study).

| Unadjusted for celltype                                               |                     |            |                                  |            |        |          |          |
|-----------------------------------------------------------------------|---------------------|------------|----------------------------------|------------|--------|----------|----------|
| NO <sub>2</sub> at pregnancy → Methylation at birth (EDEN+INMA n=280) |                     |            |                                  |            |        |          |          |
| Chr                                                                   | Position (build 37) | CpG        | Mapped gene                      | Gene group | Coef   | SE       | P-value  |
| 17                                                                    | 43394547            | cg03787849 | MAP3K14 <sup>FDR</sup>           | Island     | 0.002  | 4.09E-04 | 7.69E-08 |
| 19                                                                    | 5709149             | cg12283362 | LONP1 <sup>FDR</sup>             | S_Shore    | -0.007 | 1.42E-03 | 3.62E-07 |
| 11                                                                    | 62439187            | cg26435734 | C11orf83;C11orf48 <sup>FDR</sup> | Island     | 0.002  | 4.03E-04 | 5.72E-07 |
| 12                                                                    | 121124951           | cg26413987 | MLEC <sup>FDR</sup>              | Island     | 0.002  | 3.34E-04 | 7.24E-07 |
| 1                                                                     | 24127146            | cg13180787 | GALE <sup>FDR</sup>              | Island     | 0.004  | 7.56E-04 | 1.15E-06 |
| 19                                                                    | 14201991            | cg17688733 | SAMD1 <sup>FDR</sup>             | OpenSea    | 0.003  | 5.89E-04 | 1.37E-06 |
| 2                                                                     | 122494609           | cg04002021 | MKI67IP <sup>FDR</sup>           | S_Shore    | 0.003  | 6.14E-04 | 1.46E-06 |
| 14                                                                    | 74416831            | cg19496328 | FAM161B;COQ6 <sup>FDR</sup>      | N_Shore    | 0.002  | 5.21E-04 | 1.67E-06 |
| 2                                                                     | 25896320            | cg20347626 | DTNB <sup>FDR</sup>              | Island     | 0.002  | 3.65E-04 | 2.10E-06 |
| 19                                                                    | 4066280             | cg06403289 | ZBTB7A <sup>FDR</sup>            | Island     | 0.005  | 9.65E-04 | 2.16E-06 |
| 6                                                                     | 33290736            | cg07689821 | DAXX                             | Island     | 0.005  | 9.54E-04 | 2.18E-06 |
| 8                                                                     | 65711658            | cg01510388 | CYP7B1                           | Island     | -0.011 | 2.36E-03 | 2.72E-06 |
| 6                                                                     | 31869521            | cg11801452 | ZBTB12                           | Island     | 0.003  | 6.09E-04 | 2.85E-06 |
| 7                                                                     | 27561178            | cg24172570 | HIBADH*                          | OpenSea    | -0.005 | 1.05E-03 | 3.35E-06 |
| 10                                                                    | 101380289           | cg08973675 | SLC25A28                         | Island     | 0.007  | 1.48E-03 | 3.47E-06 |
| 3                                                                     | 52001995            | cg07110217 | PCBP4                            | OpenSea    | 0.002  | 5.18E-04 | 3.61E-06 |
| 11                                                                    | 118307669           | cg18705039 | MLL                              | Island     | 0.009  | 1.92E-03 | 4.13E-06 |
| 6                                                                     | 28351351            | cg15964468 | ZSCAN12                          | Island     | 0.009  | 2.04E-03 | 4.31E-06 |
| 6                                                                     | 30899568            | cg26672776 | SFTA2                            | OpenSea    | -0.014 | 3.13E-03 | 4.38E-06 |
| 2                                                                     | 110873741           | cg09113530 | MALL                             | S_Shore    | -0.007 | 1.52E-03 | 4.62E-06 |
| 4                                                                     | 95679705            | cg09156233 | BMPR1B                           | Island     | -0.001 | 1.87E-04 | 4.74E-06 |
| 11                                                                    | 1968310             | cg18482326 | MRPL23                           | N_Shore    | 0.005  | 1.18E-03 | 5.44E-06 |
| 19                                                                    | 39897430            | cg07051257 | ZFP36                            | Island     | 0.006  | 1.27E-03 | 5.68E-06 |
| 12                                                                    | 7070317             | cg22260508 | PTPN6                            | OpenSea    | 0.004  | 8.60E-04 | 6.17E-06 |
| 17                                                                    | 78851213            | cg08314949 | RPTOR                            | S_Shore    | 0.016  | 3.46E-03 | 6.29E-06 |
| Adjusted for celltype according to Bakulski                           |                     |            |                                  |            |        |          |          |
| NO <sub>2</sub> at pregnancy → Methylation at birth (EDEN+INMA n=280) |                     |            |                                  |            |        |          |          |
| Chr                                                                   | Position (build 37) | CpG        | Mapped gene                      | Gene group | Coef   | SE       | P-value  |
| 19                                                                    | 5709149             | cg12283362 | LONP1 <sup>FDR</sup>             | S_Shore    | -0.007 | 1.28E-03 | 1.37E-07 |
| 2                                                                     | 122494609           | cg04002021 | MKI67IP <sup>FDR</sup>           | S_Shore    | 0.003  | 5.40E-04 | 1.71E-07 |
| 6                                                                     | 43244304            | cg06241901 | TTBK1 <sup>FDR</sup>             | Island     | -0.008 | 1.68E-03 | 6.08E-07 |
| 17                                                                    | 43394547            | cg03787849 | MAP3K14 <sup>FDR</sup>           | Island     | 0.002  | 4.49E-04 | 6.08E-07 |
| 17                                                                    | 42989137            | cg20911989 | GFAP <sup>FDR</sup>              | Island     | -0.009 | 1.72E-03 | 7.31E-07 |
| 12                                                                    | 121124951           | cg26413987 | MLEC <sup>FDR</sup>              | Island     | 0.002  | 3.29E-04 | 8.23E-07 |
| 17                                                                    | 77768687            | cg04986373 | CBX8 <sup>FDR</sup>              | N_Shore    | 0.006  | 1.31E-03 | 9.56E-07 |
| 8                                                                     | 65711658            | cg01510388 | CYP7B1 <sup>FDR</sup>            | Island     | -0.011 | 2.24E-03 | 1.13E-06 |
| 14                                                                    | 74416831            | cg19496328 | FAM161B;COQ6 <sup>FDR</sup>      | N_Shore    | 0.002  | 5.01E-04 | 1.50E-06 |

|    |           |            |                                     |         |        |          |          |
|----|-----------|------------|-------------------------------------|---------|--------|----------|----------|
| 11 | 118307669 | cg18705039 | <i>MLL</i> <sup>FDR</sup>           | Island  | 0.009  | 1.83E-03 | 1.54E-06 |
| 19 | 4066280   | cg06403289 | <i>ZBTB7A</i> <sup>FDR</sup>        | Island  | 0.005  | 9.70E-04 | 1.57E-06 |
| 2  | 241498221 | cg24958325 | <i>ANKMY1;DUSP28</i> <sup>FDR</sup> | N_Shore | 0.004  | 7.30E-04 | 1.58E-06 |
| 6  | 30899568  | cg26672776 | <i>SFTA2</i> <sup>FDR</sup>         | OpenSea | -0.014 | 2.98E-03 | 1.72E-06 |
| 3  | 52443970  | cg10956904 | <i>BAP1;PHF7</i> <sup>FDR</sup>     | Island  | 0.003  | 5.35E-04 | 1.89E-06 |
| 16 | 75021994  | cg06383207 |                                     | S_Shelf | -0.007 | 1.56E-03 | 2.41E-06 |
| 20 | 3030247   | cg25472862 |                                     | S_Shelf | 0.003  | 7.39E-04 | 2.46E-06 |
| 10 | 101380289 | cg08973675 | <i>SLC25A28</i>                     | Island  | 0.007  | 1.45E-03 | 2.71E-06 |
| 19 | 14201991  | cg17688733 | <i>SAMD1</i>                        | OpenSea | 0.003  | 5.60E-04 | 2.88E-06 |
| 6  | 33393786  | cg21726235 | <i>SYNGAP1</i>                      | Island  | 0.004  | 8.75E-04 | 2.95E-06 |
| 3  | 52001995  | cg07110217 | <i>PCBP4</i>                        | OpenSea | 0.002  | 5.32E-04 | 3.44E-06 |
| 8  | 48099615  | cg03271173 |                                     | N_Shore | -0.003 | 5.87E-04 | 3.88E-06 |
| 1  | 1821981   | cg03716942 | <i>GNB1</i>                         | Island  | 0.002  | 4.87E-04 | 4.56E-06 |
| 16 | 30106682  | cg26709300 | <i>YPEL3</i>                        | N_Shore | 0.006  | 1.41E-03 | 5.11E-06 |
| 19 | 17463255  | cg01610636 | <i>PLVAP</i>                        | S_Shore | -0.005 | 1.13E-03 | 5.16E-06 |
| 11 | 62439187  | cg26435734 | <i>C11orf83;C11orf48</i>            | Island  | 0.002  | 4.22E-04 | 5.30E-06 |

Estimates are presented per 10 µg/m<sup>3</sup> increase in NO<sub>2</sub> exposure. Column headers: CHR: chromosome; Position: Chromosomal position based on NCBI human reference genome assembly Build 37. Mapped Gene: UCSC annotated gene; Gene Group: UCSC gene region feature category; regression coefficient; SE: standard error for regression coefficient;

\*cg24172570 is located 3.8 kbp upstream of *HIBADH*.

**Table S4.** Look-up in older children for top 25 findings for prenatal NO<sub>2</sub> exposure in relation to methylation in meta-analysis of newborns.

| Meta-analysis of cord blood results (MeDALL + Generation R + CHS + MoBa) |                     |            |                                |               |        |          |          |           | Replication in 4-year-old children of the MeDALL cohorts    |        |               |                                                         |        | Replication in 8-year-old children of the MeDALL + EpiGene cohorts (meta-analysis) |                                                             |        |              |                                                         |        |             |
|--------------------------------------------------------------------------|---------------------|------------|--------------------------------|---------------|--------|----------|----------|-----------|-------------------------------------------------------------|--------|---------------|---------------------------------------------------------|--------|------------------------------------------------------------------------------------|-------------------------------------------------------------|--------|--------------|---------------------------------------------------------|--------|-------------|
| NO <sub>2</sub> pregnancy → Methylation at birth (n=1,508)               |                     |            |                                |               |        |          |          |           | NO <sub>2</sub> at pregnancy → Methylation at 4 yrs (n=733) |        |               | NO <sub>2</sub> at 4 yrs → Methylation at 4 yrs (n=689) |        |                                                                                    | NO <sub>2</sub> at pregnancy → Methylation at 8 yrs (n=786) |        |              | NO <sub>2</sub> at 8 yrs → Methylation at 8 yrs (n=829) |        |             |
| Chr                                                                      | Position (build 37) | CpG        | Mapped gene                    | Gene group    | Coef   | SE       | P-value  | Direction | Coef                                                        | SE     | P-value       | Coef                                                    | SE     | P-value                                                                            | Coef                                                        | SE     | P-value      | Coef                                                    | SE     | P-value     |
| 19                                                                       | 5709149             | cg12283362 | <i>LONP1</i> <sup>FDR</sup>    | Body          | -0.007 | 1.40E-03 | 1.78E-07 | ??-**     | 0.002                                                       | 0.0012 | 0.21          | 0.001                                                   | 0.0012 | 0.37                                                                               | 0.000                                                       | 0.0013 | 0.95         | 0.002                                                   | 0.0019 | 0.24        |
| 7                                                                        | 27561178            | cg24172570 | <i>HIBADH</i> * <sup>FDR</sup> |               | -0.004 | 8.00E-04 | 3.01E-07 | --?-*     | 0.001                                                       | 0.0009 | 0.16          | 0.002                                                   | 0.0012 | 0.19                                                                               | 0.001                                                       | 0.0015 | 0.69         | 0.003                                                   | 0.0020 | 0.18        |
| 10                                                                       | 101380289           | cg08973675 | <i>SLC25A28</i> <sup>FDR</sup> | TSS200        | 0.005  | 1.10E-03 | 2.20E-06 | ++++      | 0.002                                                       | 0.0011 | <b>0.03</b>   | 0.001                                                   | 0.0012 | 0.47                                                                               | 0.003                                                       | 0.0012 | <b>0.04</b>  | 0.003                                                   | 0.0019 | 0.11        |
| 22                                                                       | 40355732            | cg17988310 | <i>GRAP2</i>                   | Body          | 0.004  | 9.00E-04 | 5.25E-06 | ++++      | 0.001                                                       | 0.0014 | 0.43          | 0.002                                                   | 0.0018 | 0.24                                                                               | -0.001                                                      | 0.0017 | 0.69         | 0.003                                                   | 0.0026 | 0.22        |
| 20                                                                       | 61427684            | cg14582546 | <i>C20orf20</i>                | TSS200        | 0.005  | 1.10E-03 | 5.50E-06 | ++++      | -0.001                                                      | 0.0013 | 0.30          | -0.001                                                  | 0.0011 | 0.30                                                                               | 0.001                                                       | 0.0010 | 0.44         | 0.001                                                   | 0.0016 | 0.39        |
| 22                                                                       | 39323510            | cg12276768 | <i>APOBEC3A</i> *              |               | 0.003  | 6.00E-04 | 5.60E-06 | ++++      | 0.000                                                       | 0.0009 | 0.77          | 0.001                                                   | 0.0009 | 0.22                                                                               | 0.002                                                       | 0.0010 | <b>0.04</b>  | 0.002                                                   | 0.0014 | 0.16        |
| 6                                                                        | 30688588            | cg21660604 | <i>TUBB</i>                    | Body          | 0.002  | 3.00E-04 | 8.36E-06 | ++++      | 0.000                                                       | 0.0004 | 0.45          | 0.000                                                   | 0.0004 | 0.86                                                                               | 0.000                                                       | 0.0004 | 0.84         | 0.001                                                   | 0.0007 | 0.06        |
| 5                                                                        | 77284206            | cg26815688 | <i>AP3B1</i> *                 |               | -0.002 | 5.00E-04 | 9.03E-06 | ----      | 0.000                                                       | 0.0006 | 0.41          | 0.001                                                   | 0.0006 | 0.16                                                                               | 0.001                                                       | 0.0006 | 0.27         | -0.001                                                  | 0.0009 | 0.40        |
| 6                                                                        | 30524763            | cg03860665 | <i>PRR3;GNLI</i>               | 5'UTR;1stExon | 0.002  | 5.00E-04 | 9.17E-06 | ++++      | 0.001                                                       | 0.0007 | 0.29          | 0.000                                                   | 0.0007 | 0.68                                                                               | 0.000                                                       | 0.0009 | 0.63         | 0.001                                                   | 0.0011 | 0.57        |
| 7                                                                        | 117824040           | cg08301459 | <i>NAA38</i>                   | TSS200        | 0.002  | 3.00E-04 | 9.58E-06 | ++?+      | 0.001                                                       | 0.0005 | 0.12          | 0.001                                                   | 0.0006 | 0.07                                                                               | 0.000                                                       | 0.0005 | 0.75         | 0.000                                                   | 0.0007 | 0.62        |
| 6                                                                        | 33359817            | cg04757012 | <i>KIFC1</i>                   | Body          | 0.001  | 3.00E-04 | 1.01E-05 | ++++      | 0.000                                                       | 0.0004 | 0.76          | 0.000                                                   | 0.0005 | 0.82                                                                               | 0.000                                                       | 0.0004 | 0.56         | 0.000                                                   | 0.0006 | 0.86        |
| 11                                                                       | 74871202            | cg12537437 | <i>SLCO2B1</i>                 | Body;5'UTR    | -0.004 | 8.00E-04 | 1.02E-05 | ---+      | -0.001                                                      | 0.0007 | 0.34          | 0.000                                                   | 0.0007 | 0.86                                                                               | 0.001                                                       | 0.0009 | 0.40         | 0.001                                                   | 0.0013 | 0.47        |
| 1                                                                        | 35226135            | cg01828548 | <i>GJB4</i>                    | 5'UTR         | -0.005 | 1.10E-03 | 1.08E-05 | ---+      | 0.001                                                       | 0.0012 | 0.22          | 0.001                                                   | 0.0015 | 0.40                                                                               | -0.004                                                      | 0.0015 | <b>0.01</b>  | -0.006                                                  | 0.0023 | <b>0.01</b> |
| 21                                                                       | 46032086            | cg26386968 | <i>C21orf29;KRTAP10-8</i>      | Body;1stExon  | -0.007 | 1.50E-03 | 1.15E-05 | --?-      | -0.003                                                      | 0.0011 | <b>0.02</b>   | -0.002                                                  | 0.0013 | 0.11                                                                               | -0.002                                                      | 0.0014 | 0.11         | -0.002                                                  | 0.0022 | 0.27        |
| 9                                                                        | 139607421           | cg12657416 | <i>FAM69B</i>                  | Body          | 0.103  | 2.36E-02 | 1.22E-05 | ?+?+      | NA                                                          | NA     | NA            | NA                                                      | NA     | NA                                                                                 | NA                                                          | NA     | NA           | NA                                                      | NA     | NA          |
| 11                                                                       | 34460856            | cg03728580 | <i>CAT</i>                     | Body          | 0.003  | 7.00E-04 | 1.43E-05 | ++++      | 0.000                                                       | 0.0010 | 1.00          | 0.000                                                   | 0.0012 | 0.85                                                                               | 0.000                                                       | 0.0010 | 0.97         | 0.001                                                   | 0.0016 | 0.68        |
| 2                                                                        | 231809697           | cg21022949 | <i>GPR55</i> *                 |               | 0.001  | 2.00E-04 | 1.51E-05 | ++++      | 0.000                                                       | 0.0003 | 0.77          | 0.000                                                   | 0.0004 | 0.68                                                                               | 0.001                                                       | 0.0004 | <b>0.001</b> | 0.000                                                   | 0.0006 | 0.89        |
| 2                                                                        | 98409069            | cg06840305 | <i>TMEM131</i>                 | Body          | -0.002 | 4.00E-04 | 1.51E-05 | ----      | 0.000                                                       | 0.0006 | 0.70          | 0.001                                                   | 0.0006 | 0.10                                                                               | 0.000                                                       | 0.0008 | 0.84         | 0.002                                                   | 0.0011 | <b>0.04</b> |
| 12                                                                       | 120967065           | cg11075121 | <i>COQ5</i>                    | TSS200        | 0.002  | 4.00E-04 | 1.66E-05 | ++++      | 0.000                                                       | 0.0006 | 0.48          | 0.001                                                   | 0.0007 | 0.40                                                                               | 0.001                                                       | 0.0006 | 0.06         | 0.002                                                   | 0.0009 | <b>0.03</b> |
| 8                                                                        | 48099615            | cg03271173 | <i>IGLV8OR8-1</i> *            |               | -0.003 | 6.00E-04 | 1.70E-05 | --+       | -0.001                                                      | 0.0005 | 0.33          | 0.000                                                   | 0.0007 | 0.89                                                                               | 0.000                                                       | 0.0007 | 0.58         | 0.000                                                   | 0.0010 | 0.75        |
| 8                                                                        | 110346503           | cg25407888 | <i>ENY2;NUDCD1</i>             | TSS200        | 0.003  | 6.00E-04 | 1.98E-05 | ++++      | 0.000                                                       | 0.0009 | 0.70          | 0.000                                                   | 0.0009 | 0.58                                                                               | 0.000                                                       | 0.0009 | 0.74         | 0.000                                                   | 0.0011 | 0.73        |
| 21                                                                       | 45753677            | cg24316255 | <i>C21orf2</i>                 | Body          | -0.003 | 6.00E-04 | 2.00E-05 | ---+      | -0.001                                                      | 0.0007 | 0.14          | 0.000                                                   | 0.0009 | 1.00                                                                               | -0.001                                                      | 0.0009 | 0.12         | -0.001                                                  | 0.0012 | 0.57        |
| 17                                                                       | 78851213            | cg08314949 | <i>RPTOR</i>                   | Body;Body     | 0.013  | 3.10E-03 | 2.06E-05 | +?+       | 0.015                                                       | 0.0039 | <b>0.0001</b> | 0.010                                                   | 0.0047 | <b>0.04</b>                                                                        | -0.006                                                      | 0.0053 | 0.23         | 0.003                                                   | 0.0072 | 0.66        |
| 15                                                                       | 59063272            | cg01889112 | <i>FAM63B</i>                  | TSS200;TSS200 | 0.002  | 4.00E-04 | 2.29E-05 | ++++      | 0.000                                                       | 0.0006 | 0.89          | 0.001                                                   | 0.0007 | 0.40                                                                               | 0.000                                                       | 0.0006 | 0.75         | 0.001                                                   | 0.0009 | 0.45        |
| 6                                                                        | 31382102            | cg26504614 | <i>MICA</i>                    | Body          | -0.005 | 1.10E-03 | 2.59E-05 | ?--       | 0.000                                                       | 0.0010 | 0.65          | 0.000                                                   | 0.0010 | 0.97                                                                               | -0.003                                                      | 0.0010 | <b>0.001</b> | -0.001                                                  | 0.0015 | 0.61        |

Shown are top 25 CpGs from the discovery meta-analysis ordered by p-value; Estimates are presented per 10  $\mu\text{g}/\text{m}^3$  increase in  $\text{NO}_2$  exposure. Chr: chromosome; Direction: Direction of effect across cohorts included in the meta-analysis (MeDALL, Generation R, CHS and MoBa):  $\text{NO}_2$  exposure during pregnancy associated with increased (+) or decreased (-) methylation, or missing (?) result; NA=not available.

\* cg24172570 is located 3.8 kbp upstream of *HIBADH*, cg12276768 – 25.2 kbp upstream of *APOBEC3A*, cg26815688 - 21.1 kbp upstream of *AP3BI*, cg21022949 – 19.7 kbp downstream of *GPR55*, cg03271173 - 14.5 kbp upstream of *IGLV8OR8-1*.

\*\* Data on methylation of cg12283362 was available in 473 individuals, cg24172570 - in 1282 individuals.

**Table S5.** Look-up in 4-year-old children with paired cord blood and 4-year-old samples for top 25 findings for prenatal NO<sub>2</sub> exposure in relation to methylation in meta-analysis of newborns.

| Meta-analysis of cord blood results (MeDALL + Generation R + CHS + MoBa) |                     |            |                                |               |        |          |          | Replication in 4-year-old children of the MeDALL cohorts           |        |          |                |
|--------------------------------------------------------------------------|---------------------|------------|--------------------------------|---------------|--------|----------|----------|--------------------------------------------------------------------|--------|----------|----------------|
| NO <sub>2</sub> pregnancy → Methylation at birth (n=1,508)               |                     |            |                                |               |        |          |          | NO <sub>2</sub> pregnancy → Methylation at 4 yrs INMA+EDEN (n=277) |        |          |                |
| Chr                                                                      | Position (build 37) | CpG        | Mapped gene                    | Gene group    | Coef   | SE       | P-value  | Direction                                                          | Coef   | SE       | P-value        |
| 19                                                                       | 5709149             | cg12283362 | <i>LONP1</i> <sup>FDR</sup>    | Body          | -0.007 | 1.40E-03 | 1.78E-07 | -?*-**                                                             | 0.001  | 1.58E-03 | 0.42           |
| 7                                                                        | 27561178            | cg24172570 | <i>HIBADH</i> * <sup>FDR</sup> |               | -0.004 | 8.00E-04 | 3.01E-07 | --?*-**                                                            | 0.001  | 1.28E-03 | 0.54           |
| 10                                                                       | 101380289           | cg08973675 | <i>SLC25A28</i> <sup>FDR</sup> | TSS200        | 0.005  | 1.10E-03 | 2.20E-06 | ++++                                                               | 0.004  | 1.46E-03 | <b>0.005</b>   |
| 22                                                                       | 40355732            | cg17988310 | <i>GRAP2</i>                   | Body          | 0.004  | 9.00E-04 | 5.25E-06 | ++++                                                               | 0.005  | 2.03E-03 | <b>0.02</b>    |
| 20                                                                       | 61427684            | cg14582546 | <i>C20orf20</i>                | TSS200        | 0.005  | 1.10E-03 | 5.50E-06 | ++++                                                               | 0.001  | 2.02E-03 | 0.61           |
| 22                                                                       | 39323510            | cg12276768 | <i>APOBEC3A</i> *              |               | 0.003  | 6.00E-04 | 5.60E-06 | ++++                                                               | 0.001  | 9.76E-04 | 0.45           |
| 6                                                                        | 30688588            | cg21660604 | <i>TUBB</i>                    | Body          | 0.002  | 3.00E-04 | 8.36E-06 | ++++                                                               | 0.000  | 5.56E-04 | 0.55           |
| 5                                                                        | 77284206            | cg26815688 | <i>AP3B1</i> *                 |               | -0.002 | 5.00E-04 | 9.03E-06 | ----                                                               | 0.000  | 8.77E-04 | 0.66           |
| 6                                                                        | 30524763            | cg03860665 | <i>PRR3;GNLI</i>               | 5'UTR;1stExon | 0.002  | 5.00E-04 | 9.17E-06 | ++++                                                               | 0.001  | 8.84E-04 | 0.37           |
| 7                                                                        | 117824040           | cg08301459 | <i>NAA38</i>                   | TSS200        | 0.002  | 3.00E-04 | 9.58E-06 | ++?+                                                               | 0.002  | 6.55E-04 | <b>0.001</b>   |
| 6                                                                        | 33359817            | cg04757012 | <i>KIFC1</i>                   | Body          | 0.001  | 3.00E-04 | 1.01E-05 | ++++                                                               | 0.001  | 5.24E-04 | 0.05           |
| 11                                                                       | 74871202            | cg12537437 | <i>SLCO2B1</i>                 | Body;5'UTR    | -0.004 | 8.00E-04 | 1.02E-05 | ---+                                                               | -0.001 | 9.14E-04 | 0.11           |
| 1                                                                        | 35226135            | cg01828548 | <i>GJB4</i>                    | 5'UTR         | -0.005 | 1.10E-03 | 1.08E-05 | ---+                                                               | -0.002 | 1.57E-03 | 0.23           |
| 21                                                                       | 46032086            | cg26386968 | <i>C21orf29;KRTAP10-8</i>      | Body;1stExon  | -0.007 | 1.50E-03 | 1.15E-05 | --?-                                                               | -0.006 | 1.53E-03 | <b>0.00005</b> |
| 9                                                                        | 139607421           | cg12657416 | <i>FAM69B</i>                  | Body          | 0.103  | 2.36E-02 | 1.22E-05 | ?+?+                                                               | NA     | NA       | NA             |
| 11                                                                       | 34460856            | cg03728580 | <i>CAT</i>                     | Body          | 0.003  | 7.00E-04 | 1.43E-05 | ++++                                                               | 0.000  | 1.41E-03 | 0.77           |
| 2                                                                        | 231809697           | cg21022949 | <i>GPR55</i> *                 |               | 0.001  | 2.00E-04 | 1.51E-05 | ++++                                                               | 0.000  | 4.22E-04 | 0.95           |
| 2                                                                        | 98409069            | cg06840305 | <i>TMEM131</i>                 | Body          | -0.002 | 4.00E-04 | 1.51E-05 | ----                                                               | -0.001 | 9.01E-04 | 0.33           |
| 12                                                                       | 120967065           | cg11075121 | <i>COQ5</i>                    | TSS200        | 0.002  | 4.00E-04 | 1.66E-05 | ++++                                                               | 0.001  | 8.22E-04 | 0.14           |
| 8                                                                        | 48099615            | cg03271173 | <i>IGLV8OR8-1</i> *            |               | -0.003 | 6.00E-04 | 1.70E-05 | --+-                                                               | -0.001 | 8.26E-04 | 0.10           |
| 8                                                                        | 110346503           | cg25407888 | <i>ENY2;NUDCD1</i>             | TSS200        | 0.003  | 6.00E-04 | 1.98E-05 | ++++                                                               | 0.000  | 1.40E-03 | 0.81           |
| 21                                                                       | 45753677            | cg24316255 | <i>C21orf2</i>                 | Body          | -0.003 | 6.00E-04 | 2.00E-05 | ---+                                                               | -0.002 | 1.07E-03 | 0.15           |
| 17                                                                       | 78851213            | cg08314949 | <i>RPTOR</i>                   | Body;Body     | 0.013  | 3.10E-03 | 2.06E-05 | +?-?                                                               | 0.017  | 4.41E-03 | <b>0.0002</b>  |
| 15                                                                       | 59063272            | cg01889112 | <i>FAM63B</i>                  | TSS200;TSS200 | 0.002  | 4.00E-04 | 2.29E-05 | ++++                                                               | 0.001  | 8.21E-04 | 0.19           |
| 6                                                                        | 31382102            | cg26504614 | <i>MICA</i>                    | Body          | -0.005 | 1.10E-03 | 2.59E-05 | -?--                                                               | 0.000  | 1.23E-03 | 0.81           |

Shown are top 25 CpGs from the discovery meta-analysis ordered by p-value; Estimates are presented per 10  $\mu\text{g}/\text{m}^3$  increase in  $\text{NO}_2$  exposure. Column headers: CHR: chromosome; Position: Chromosomal position based on NCBI human reference genome assembly Build 37. Mapped Gene: UCSC annotated gene; Gene Group: UCSC gene region feature category; regression coefficient; SE: standard error for regression coefficient; Direction: Direction of effect across cohorts included in the statistical model (MeDALL, Generation R, CHS and MoBa):  $\text{NO}_2$  exposure during pregnancy associated with increased (+) or decreased (-) methylation, or missing (?) result. NA=not available

\* cg24172570 is located 3.8 kbp upstream of *HIBADH*, cg12276768 – 25.2 kbp upstream of *APOBEC3A*, cg26815688 - 21.1 kbp upstream of *AP3BI*, cg21022949 – 19.7 kbp downstream of *GPR55*, cg03271173 - 14.5 kbp upstream of *IGLV8OR8-1*.

\*\* Data on methylation of cg12283362 was available in 473 individuals, cg24172570 - in 1282 individuals.

**Table S6.** Nominally significant CpGs within oxidative stress genes extracted from the epigenome-wide meta-analysis of the association between prenatal NO<sub>2</sub> exposure and newborn cord blood DNA methylation (n=1,508 newborns from MeDALL, Generation R, CHS and MoBa cohorts).

| Chr | Position (build 37) | CpG           | Mapped gene               | Gene group    | Coef   | SE    | P-value        | Direction |
|-----|---------------------|---------------|---------------------------|---------------|--------|-------|----------------|-----------|
| 11  | 34460856            | cg03728580    | <i>CAT</i> <sup>FDR</sup> | Body          | 0.003  | 0.001 | <b>0.00001</b> | ++++      |
| 11  | 34461028            | cg17034036    | <i>CAT</i> <sup>FDR</sup> | Body          | 0.002  | 0.001 | <b>0.0001</b>  | ++++      |
| 2   | 1482597             | cg01385533    | <i>TPO</i> <sup>FDR</sup> | Body          | -0.003 | 0.001 | <b>0.0004</b>  | -?--      |
| 1   | 226023590           | cg05935800    | <i>EPHX1</i>              | Body          | -0.002 | 0.001 | <b>0.002</b>   | ----      |
| 20  | 33539306            | cg13607138    | <i>GSS</i>                | Body          | -0.003 | 0.001 | <b>0.003</b>   | --?-      |
| 8   | 107642385           | cg17526936    | <i>OXR1</i>               | Body          | -0.002 | 0.001 | <b>0.004</b>   | --?-      |
| 2   | 1544120             | cg19407717    | <i>TPO</i>                | Body          | -0.002 | 0.001 | <b>0.004</b>   | ----      |
| 2   | 1479523             | cg13703866    | <i>TPO</i>                | Body          | -0.001 | 0.000 | 0.005          | ----      |
| 11  | 34460336            | cg07768201    | <i>CAT</i>                | TSS200        | 0.003  | 0.001 | 0.006          | ++++      |
| 1   | 226012507           | cg03337430    | <i>EPHX1</i>              | TSS1500;5'UTR | 0.001  | 0.000 | 0.006          | +---      |
| 2   | 1416855             | cg08946720    | <i>TPO</i>                | TSS1500       | -0.002 | 0.001 | 0.006          | --?+      |
| 2   | 1743009             | cg01821226    | <i>PXDN</i>               | Body          | -0.001 | 0.001 | 0.007          | ----      |
| 2   | 1654326             | cg08380973    | <i>PXDN</i>               | Body          | -0.003 | 0.001 | 0.009          | ----      |
| 2   | 1518383             | cg24215279    | <i>TPO</i>                | Body          | 0.001  | 0.000 | 0.011          | +--+      |
| 6   | 160113813           | cg14515483    | <i>SOD2</i>               | Body          | 0.001  | 0.000 | 0.012          | ++++      |
| 2   | 1652518             | cg26063629    | <i>PXDN</i>               | Body          | -0.002 | 0.001 | 0.012          | ---+      |
| 11  | 34460351            | cg03720043    | <i>CAT</i>                | TSS200        | 0.003  | 0.001 | 0.012          | ++++      |
| 11  | 67351273            | cg26250609    | <i>GSTP1</i>              | 1stExon;5'UTR | 0.002  | 0.001 | 0.013          | ++++      |
| 17  | 26120702            | cg01396112    | <i>NOS2</i>               | Body          | 0.000  | 0.000 | 0.016          | ---+      |
| 2   | 1488516             | cg02892893    | <i>TPO</i>                | Body          | -0.001 | 0.001 | 0.018          | --?-      |
| 15  | 45406362            | cg10778736    | <i>DUOX2</i>              | TSS200        | 0.002  | 0.001 | 0.018          | ++++      |
| 15  | 45405370            | cg07821960    | <i>DUOX2</i>              | Body;TSS1500  | 0.001  | 0.000 | 0.018          | ++++      |
| 17  | 26084080            | cg15088880    | <i>NOS2</i>               | 3'UTR         | 0.005  | 0.002 | 0.019          | ??+-      |
| 8   | 52618305            | ch.8.1157478F | <i>PXDNL</i>              | Body          | 0.004  | 0.002 | 0.020          | ++?+      |
| 2   | 1425205             | cg06972972    | <i>TPO</i>                | Body          | -0.001 | 0.000 | 0.021          | ----      |
| 2   | 201450731           | cg12627583    | <i>AOX1</i>               | 1stExon;5'UTR | 0.001  | 0.001 | 0.021          | +++-      |
| 7   | 2289888             | cg13748354    | <i>NUDT1</i>              | Body          | 0.038  | 0.016 | 0.022          | ?+?+      |
| 2   | 1478219             | cg25013910    | <i>TPO</i>                | Body          | -0.004 | 0.002 | 0.022          | --?-      |
| 11  | 67350499            | cg05244766    | <i>GSTP1</i>              | TSS1500       | -0.002 | 0.001 | 0.024          | -?+-      |
| 3   | 38207809            | cg15789250    | <i>OXSRI</i>              | Body          | 0.005  | 0.002 | 0.025          | ++++      |
| 2   | 201450690           | cg02144933    | <i>AOX1</i>               | TSS200        | 0.001  | 0.000 | 0.029          | ++++      |
| 16  | 69760301            | cg06790860    | <i>NQO1</i>               | Body          | 0.001  | 0.000 | 0.032          | +---      |
| 2   | 1668758             | cg12624031    | <i>PXDN</i>               | Body          | -0.001 | 0.001 | 0.034          | ----      |
| 17  | 56274480            | cg08105265    | <i>EPX</i>                | Body          | 0.002  | 0.001 | 0.034          | +?++      |
| 8   | 52721657            | cg02090805    | <i>PXDNL</i>              | Body          | 0.001  | 0.001 | 0.035          | +++-      |
| 8   | 107738435           | cg12114888    | <i>OXR1</i>               | Body          | 0.005  | 0.002 | 0.037          | ++++      |
| 2   | 1682068             | cg09996777    | <i>PXDN</i>               | Body          | -0.003 | 0.001 | 0.040          | --?-      |
| 2   | 1493713             | cg06173919    | <i>TPO</i>                | Body          | -0.002 | 0.001 | 0.041          | --?+      |



|    |           |            |               |                    |        |       |       |      |
|----|-----------|------------|---------------|--------------------|--------|-------|-------|------|
| 1  | 225996810 | cg21826272 | <i>EPHX1</i>  | TSS1500            | -0.002 | 0.001 | 0.043 | --?- |
| 7  | 2281541   | cg04305677 | <i>NUDT1</i>  | TSS1500            | 0.000  | 0.000 | 0.044 | --++ |
| 11 | 67350491  | cg08925882 | <i>GSTP1</i>  | TSS1500            | -0.004 | 0.002 | 0.045 | ??-- |
| 2  | 178128234 | cg16842060 | <i>NFE2L2</i> | Body;1stExon;5'UTR | 0.000  | 0.000 | 0.047 | +--+ |
| 7  | 2284600   | cg03663120 | <i>NUDT1</i>  | Body               | 0.007  | 0.004 | 0.048 | ++?+ |
| 1  | 53068579  | cg23272399 | <i>GPX7</i>   | Body               | -0.001 | 0.001 | 0.049 | ---- |
| 6  | 160114681 | cg04311230 | <i>SOD2</i>   | TSS1500            | 0.000  | 0.000 | 0.049 | -+++ |

Shown here are the 45 nominally significant ( $p < 0.05$ ) CpGs ordered by p-value. Three CpGs were statistically significant using genome-wide significance threshold (FDR  $p < 0.05$ ). Results presented per 10  $\mu\text{g}/\text{m}^3$  increase in prenatal  $\text{NO}_2$  exposure.

Column headers: CHR=chromosome; Position=Chromosomal position based on NCBI human reference genome assembly Build 37. Mapped Gene=UCSC annotated gene; Gene Group=UCSC gene region feature category; regression coefficient; SE=standard error for regression coefficient; Direction=Direction of effect across cohorts included in the statistical model (MeDALL, Generation R, CHS and MoBa):  $\text{NO}_2$  exposure during pregnancy associated with increased (+) or decreased (-) methylation, or missing (?) result.

**Table S7.** All available CpGs mapped to *CAT* gene from the epigenome-wide meta-analysis of the association between NO<sub>2</sub> exposure during pregnancy and newborn cord blood DNA methylation (N=1,508 newborns from MeDALL, Generation R, CHS and MoBa cohorts).

| Chr | Position (build 37) | CpG        | Mapped gene | Gene group | Coef   | SE       | P-value        | Direction |
|-----|---------------------|------------|-------------|------------|--------|----------|----------------|-----------|
| 11  | 34460856            | cg03728580 | <i>CAT</i>  | Island     | 0.003  | 7.00E-04 | <b>0.00001</b> | ++++      |
| 11  | 34461028            | cg17034036 | <i>CAT</i>  | S_Shore    | 0.002  | 6.00E-04 | <b>0.0001</b>  | ++++      |
| 11  | 34460336            | cg07768201 | <i>CAT</i>  | Island     | 0.003  | 1.10E-03 | <b>0.01</b>    | ++++      |
| 11  | 34460351            | cg03720043 | <i>CAT</i>  | Island     | 0.003  | 1.00E-03 | <b>0.01</b>    | ++++      |
| 11  | 34460516            | cg06908474 | <i>CAT</i>  | Island     | 0.002  | 1.00E-03 | 0.07           | ++++      |
| 11  | 34460386            | cg02109652 | <i>CAT</i>  | Island     | 0.002  | 1.00E-03 | 0.12           | -+++      |
| 11  | 34460107            | cg20234170 | <i>CAT</i>  | N_Shore    | 0.001  | 8.00E-04 | 0.19           | ++-+      |
| 11  | 34460557            | cg01847719 | <i>CAT</i>  | Island     | 0.002  | 1.50E-03 | 0.22           | ++++      |
| 11  | 34460182            | cg22159421 | <i>CAT</i>  | Island     | 0.001  | 6.00E-04 | 0.23           | +---      |
| 11  | 34460318            | cg06027906 | <i>CAT</i>  | Island     | 0.000  | 3.00E-04 | 0.24           | ++++      |
| 11  | 34460172            | cg24099074 | <i>CAT</i>  | Island     | 0.000  | 2.00E-04 | 0.25           | ++++      |
| 11  | 34460298            | cg20731136 | <i>CAT</i>  | Island     | 0.001  | 4.00E-04 | 0.26           | +---      |
| 11  | 34464477            | cg09106728 | <i>CAT</i>  | S_Shelf    | -0.001 | 1.60E-03 | 0.48           | --?+      |
| 11  | 34492984            | cg17098995 | <i>CAT</i>  | OpenSea    | 0.000  | 3.00E-04 | 0.82           | ---+      |
| 11  | 34460789            | cg14316565 | <i>CAT</i>  | Island     | 0.000  | 6.00E-04 | 0.96           | +---      |

Shown are all CpGs within *CAT* gene ordered by p-value; All results presented per 10 µg/m<sup>3</sup> increase in prenatal NO<sub>2</sub> exposure. Column headers: CHR: chromosome; Mapped Gene: UCSC annotated gene; Gene Group: UCSC gene region feature category; Coef: regression coefficient; Direction: Direction of effect across cohorts included in the statistical model (MeDALL, Generation R, CHS and MoBa): NO<sub>2</sub> exposure during pregnancy associated with increased (+) or decreased (-) methylation, or missing (?) result.

**Table S8.** All available CpGs mapped to *TPO* gene from the epigenome-wide meta-analysis of the association between NO<sub>2</sub> exposure during pregnancy and newborn cord blood DNA methylation (N=1,508 newborns from MeDALL, Generation R, CHS and MoBa cohorts).

| Chr | Position<br>(build 37) | CpG        | Mapped<br>gene | Gene<br>group | Coef   | SE       | P-value       | Direction |
|-----|------------------------|------------|----------------|---------------|--------|----------|---------------|-----------|
| 2   | 1482597                | cg01385533 | <i>TPO</i>     | S_Shore       | -0.003 | 8.00E-04 | <b>0.0004</b> | -?--      |
| 2   | 1544120                | cg19407717 | <i>TPO</i>     | N_Shore       | -0.002 | 8.00E-04 | <b>0.004</b>  | ----      |
| 2   | 1479523                | cg13703866 | <i>TPO</i>     | N_Shore       | -0.001 | 3.00E-04 | <b>0.005</b>  | ----      |
| 2   | 1416855                | cg08946720 | <i>TPO</i>     | OpenSea       | -0.002 | 8.00E-04 | <b>0.01</b>   | --?+      |
| 2   | 1518383                | cg24215279 | <i>TPO</i>     | S_Shelf       | 0.001  | 2.00E-04 | <b>0.01</b>   | ++-       |
| 2   | 1488516                | cg02892893 | <i>TPO</i>     | OpenSea       | -0.001 | 5.00E-04 | <b>0.02</b>   | --?-      |
| 2   | 1425205                | cg06972972 | <i>TPO</i>     | OpenSea       | -0.001 | 4.00E-04 | <b>0.02</b>   | ----      |
| 2   | 1478219                | cg25013910 | <i>TPO</i>     | N_Shelf       | -0.004 | 1.90E-03 | <b>0.02</b>   | --?-      |
| 2   | 1493713                | cg06173919 | <i>TPO</i>     | Island        | -0.002 | 9.00E-04 | <b>0.04</b>   | --?+      |
| 2   | 1482385                | cg26140366 | <i>TPO</i>     | S_Shore       | -0.002 | 9.00E-04 | 0.05          | ---+      |
| 2   | 1417153                | cg12680131 | <i>TPO</i>     | OpenSea       | -0.002 | 1.40E-03 | 0.09          | ----      |
| 2   | 1544321                | cg04770020 | <i>TPO</i>     | Island        | 0.000  | 2.00E-04 | 0.11          | ---+      |
| 2   | 1494063                | cg01681351 | <i>TPO</i>     | Island        | -0.003 | 1.70E-03 | 0.11          | ??--      |
| 2   | 1500117                | cg05678658 | <i>TPO</i>     | OpenSea       | -0.002 | 1.20E-03 | 0.11          | ---+      |
| 2   | 1426181                | cg03347837 | <i>TPO</i>     | OpenSea       | -0.001 | 7.00E-04 | 0.12          | -++       |
| 2   | 1493387                | cg00626390 | <i>TPO</i>     | N_Shore       | -0.001 | 6.00E-04 | 0.13          | --?+      |
| 2   | 1482838                | cg12666976 | <i>TPO</i>     | S_Shore       | -0.002 | 1.50E-03 | 0.13          | -++-      |
| 2   | 1497815                | cg13414059 | <i>TPO</i>     | S_Shelf       | -0.002 | 1.00E-03 | 0.16          | -+--      |
| 2   | 1417109                | cg16016036 | <i>TPO</i>     | OpenSea       | -0.001 | 7.00E-04 | 0.16          | -+--      |
| 2   | 1516247                | cg07713008 | <i>TPO</i>     | Island        | -0.001 | 1.00E-03 | 0.16          | ----      |
| 2   | 1494263                | cg23596425 | <i>TPO</i>     | S_Shore       | -0.003 | 1.90E-03 | 0.17          | --++      |
| 2   | 1416889                | cg00040862 | <i>TPO</i>     | OpenSea       | 0.001  | 8.00E-04 | 0.20          | -++-      |
| 2   | 1452665                | cg19368625 | <i>TPO</i>     | OpenSea       | -0.001 | 1.10E-03 | 0.21          | --++      |
| 2   | 1426094                | cg14108581 | <i>TPO</i>     | OpenSea       | -0.001 | 1.00E-03 | 0.21          | --?-      |
| 2   | 1417431                | cg10370591 | <i>TPO</i>     | OpenSea       | 0.001  | 6.00E-04 | 0.21          | ++++      |
| 2   | 1482915                | cg23985797 | <i>TPO</i>     | S_Shore       | 0.001  | 9.00E-04 | 0.21          | +---      |
| 2   | 1507739                | cg10672136 | <i>TPO</i>     | OpenSea       | -0.001 | 1.20E-03 | 0.24          | +---      |
| 2   | 1488252                | cg09337427 | <i>TPO</i>     | OpenSea       | 0.001  | 7.00E-04 | 0.24          | +---      |
| 2   | 1544370                | cg18995558 | <i>TPO</i>     | Island        | -0.001 | 6.00E-04 | 0.25          | ----      |
| 2   | 1426068                | cg10531568 | <i>TPO</i>     | OpenSea       | -0.001 | 7.00E-04 | 0.26          | -++-      |
| 2   | 1507694                | cg15375772 | <i>TPO</i>     | OpenSea       | -0.002 | 1.70E-03 | 0.27          | +---      |
| 2   | 1498138                | cg03545077 | <i>TPO</i>     | S_Shelf       | 0.001  | 1.30E-03 | 0.27          | ++?+      |
| 2   | 1498065                | cg18019372 | <i>TPO</i>     | S_Shelf       | -0.002 | 1.60E-03 | 0.27          | ---+      |
| 2   | 1418073                | cg23136645 | <i>TPO</i>     | OpenSea       | 0.000  | 4.00E-04 | 0.29          | -++-      |
| 2   | 1418028                | cg09757588 | <i>TPO</i>     | OpenSea       | 0.000  | 4.00E-04 | 0.31          | +---      |
| 2   | 1425319                | cg02963613 | <i>TPO</i>     | OpenSea       | -0.001 | 7.00E-04 | 0.33          | --+-      |
| 2   | 1487936                | cg19905414 | <i>TPO</i>     | OpenSea       | -0.001 | 8.00E-04 | 0.34          | --?-      |
| 2   | 1484593                | cg08025464 | <i>TPO</i>     | S_Shelf       | -0.003 | 2.90E-03 | 0.35          | -+--      |
| 2   | 1544474                | cg06697522 | <i>TPO</i>     | Island        | -0.001 | 7.00E-04 | 0.39          | +---      |
| 2   | 1544076                | cg17518079 | <i>TPO</i>     | N_Shore       | 0.001  | 7.00E-04 | 0.39          | +++-      |

|   |         |            |     |         |        |          |      |      |
|---|---------|------------|-----|---------|--------|----------|------|------|
| 2 | 1426328 | cg14691886 | TPO | OpenSea | -0.001 | 6.00E-04 | 0.40 | -+?- |
| 2 | 1482963 | cg20957776 | TPO | S_Shore | -0.001 | 1.30E-03 | 0.40 | --++ |
| 2 | 1488175 | cg17299636 | TPO | OpenSea | -0.001 | 1.00E-03 | 0.43 | --?- |
| 2 | 1479763 | cg02332115 | TPO | N_Shore | -0.001 | 1.10E-03 | 0.44 | ---- |
| 2 | 1500255 | cg21759048 | TPO | OpenSea | -0.001 | 8.00E-04 | 0.44 | --+- |
| 2 | 1461560 | cg15301057 | TPO | OpenSea | -0.001 | 8.00E-04 | 0.44 | -+?- |
| 2 | 1543221 | cg05090359 | TPO | N_Shore | 0.001  | 6.00E-04 | 0.45 | +++- |
| 2 | 1484125 | cg21856680 | TPO | S_Shelf | 0.001  | 6.00E-04 | 0.46 | ++-  |
| 2 | 1513998 | cg03133821 | TPO | N_Shelf | 0.000  | 6.00E-04 | 0.46 | -+-- |
| 2 | 1543327 | cg04319651 | TPO | N_Shore | 0.000  | 6.00E-04 | 0.47 | ---+ |
| 2 | 1452260 | cg16407924 | TPO | OpenSea | -0.001 | 1.90E-03 | 0.48 | +?-  |
| 2 | 1479810 | cg01112527 | TPO | N_Shore | -0.001 | 7.00E-04 | 0.48 | ---- |
| 2 | 1517047 | cg14926103 | TPO | S_Shore | 0.001  | 7.00E-04 | 0.50 | +--+ |
| 2 | 1494681 | cg14011419 | TPO | S_Shore | 0.001  | 1.10E-03 | 0.52 | ++?- |
| 2 | 1500368 | cg17494408 | TPO | OpenSea | 0.000  | 7.00E-04 | 0.54 | -++- |
| 2 | 1489909 | cg25250661 | TPO | N_Shelf | -0.001 | 1.30E-03 | 0.56 | +--- |
| 2 | 1417164 | cg06500727 | TPO | OpenSea | -0.001 | 9.00E-04 | 0.57 | +--+ |
| 2 | 1516240 | cg24798914 | TPO | Island  | 0.000  | 4.00E-04 | 0.58 | +--- |
| 2 | 1497906 | cg02924495 | TPO | S_Shelf | 0.000  | 7.00E-04 | 0.59 | ++?+ |
| 2 | 1544352 | cg06574769 | TPO | Island  | 0.000  | 7.00E-04 | 0.60 | --++ |
| 2 | 1497868 | cg26541429 | TPO | S_Shelf | 0.000  | 7.00E-04 | 0.61 | --+- |
| 2 | 1488565 | cg04658693 | TPO | OpenSea | 0.000  | 7.00E-04 | 0.61 | -++- |
| 2 | 1418294 | cg15977002 | TPO | OpenSea | 0.000  | 7.00E-04 | 0.68 | +--- |
| 2 | 1426845 | cg07088935 | TPO | OpenSea | 0.000  | 1.00E-03 | 0.68 | ++-- |
| 2 | 1542097 | cg01028140 | TPO | N_Shelf | 0.000  | 9.00E-04 | 0.69 | --++ |
| 2 | 1507832 | cg23239637 | TPO | OpenSea | 0.000  | 2.00E-04 | 0.71 | --+- |
| 2 | 1543996 | cg11275685 | TPO | N_Shore | 0.000  | 6.00E-04 | 0.72 | --++ |
| 2 | 1481097 | cg14601038 | TPO | Island  | -0.001 | 2.10E-03 | 0.72 | --++ |
| 2 | 1480789 | cg07932899 | TPO | Island  | -0.001 | 1.80E-03 | 0.73 | -+++ |
| 2 | 1487895 | cg19585646 | TPO | OpenSea | 0.000  | 1.00E-03 | 0.73 | ++?- |
| 2 | 1488638 | cg14935163 | TPO | OpenSea | 0.000  | 3.00E-04 | 0.76 | ++-- |
| 2 | 1425035 | cg14478255 | TPO | OpenSea | 0.000  | 7.00E-04 | 0.77 | -+-+ |
| 2 | 1425560 | cg26277787 | TPO | OpenSea | 0.000  | 7.00E-04 | 0.80 | ++-- |
| 2 | 1481492 | cg08537127 | TPO | Island  | 0.001  | 5.50E-03 | 0.81 | ?-?+ |
| 2 | 1417248 | cg07083862 | TPO | OpenSea | 0.000  | 8.00E-04 | 0.86 | ++-  |
| 2 | 1543546 | cg21913853 | TPO | N_Shore | 0.000  | 5.00E-04 | 0.87 | ++-- |
| 2 | 1452367 | cg26605809 | TPO | OpenSea | 0.000  | 1.30E-03 | 0.88 | -+++ |
| 2 | 1482185 | cg21997141 | TPO | S_Shore | 0.000  | 8.00E-04 | 0.89 | --+- |
| 2 | 1426301 | cg05544715 | TPO | OpenSea | 0.000  | 3.00E-04 | 0.92 | -+-- |
| 2 | 1426674 | cg24216893 | TPO | OpenSea | 0.000  | 8.00E-04 | 0.92 | +--- |
| 2 | 1516061 | cg01312658 | TPO | N_Shore | 0.000  | 5.00E-04 | 0.96 | --+- |
| 2 | 1480944 | cg14793137 | TPO | Island  | 0.000  | 2.80E-03 | 0.97 | -+++ |
| 2 | 1415911 | cg25349955 | TPO | OpenSea | 0.000  | 6.00E-04 | 0.97 | +--+ |
| 2 | 1425620 | cg03795587 | TPO | OpenSea | 0.000  | 6.00E-04 | 0.98 | ++-- |
| 2 | 1516352 | cg13661012 | TPO | Island  | 0.000  | 4.00E-04 | 0.99 | ++-  |
| 2 | 1488314 | cg04152326 | TPO | OpenSea | 0.000  | 5.00E-04 | 1.00 | ++-- |

Shown are all CpGs within *TPO* gene ordered by p-value, with exception of cg01957222 only available in MoBa cohort. All results presented per 10  $\mu\text{g}/\text{m}^3$  increase in prenatal  $\text{NO}_2$  exposure.

Column headers: CHR: chromosome; Mapped Gene: UCSC annotated gene; Gene Group: UCSC gene region feature category; Coef: regression coefficient; Direction: Direction of effect across cohorts included in the statistical model (MeDALL, Generation R, CHS and MoBa):  $\text{NO}_2$  exposure during pregnancy associated with increased (+) or decreased (-) methylation, or missing (?) result.

**Table S9.** Look-up in older children for top CpGs in the *CAT* and *TPO* genes for prenatal NO<sub>2</sub> exposure in relation to methylation in meta-analysis of newborns (n=1,508).

| Meta-analysis of cord blood results (MeDALL + Generation R + CHS + MoBa) |                     |            |                           |            |        |          |         |           | Replication in 4-year-old children of the MeDALL cohorts    |          |         |                                                         |          |             | Replication in 8-year-old children of the MeDALL + EpiGene cohorts (meta-analysis) |          |             |                                                         |          |         |
|--------------------------------------------------------------------------|---------------------|------------|---------------------------|------------|--------|----------|---------|-----------|-------------------------------------------------------------|----------|---------|---------------------------------------------------------|----------|-------------|------------------------------------------------------------------------------------|----------|-------------|---------------------------------------------------------|----------|---------|
| NO <sub>2</sub> pregnancy → Methylation at birth (n=1,508)               |                     |            |                           |            |        |          |         |           | NO <sub>2</sub> at pregnancy → Methylation at 4 yrs (n=733) |          |         | NO <sub>2</sub> at 4 yrs → Methylation at 4 yrs (n=689) |          |             | NO <sub>2</sub> at pregnancy → Methylation at 8 yrs (n=786)                        |          |             | NO <sub>2</sub> at 8 yrs → Methylation at 8 yrs (n=829) |          |         |
| Chr                                                                      | Position (build 37) | CpG        | Mapped gene               | Gene group | Coef   | SE       | P-value | Direction | Coef                                                        | SE       | P-value | Coef                                                    | SE       | P-value     | Coef                                                                               | SE       | P-value     | Coef                                                    | SE       | P-value |
| 11                                                                       | 34460856            | cg03728580 | <i>CAT</i> <sup>FDR</sup> | Body       | 0.003  | 7.00E-04 | 0.00001 | ++++      | 0.0000                                                      | 9.62E-04 | 1.00    | 0.000                                                   | 1.23E-03 | 0.85        | 0.0000                                                                             | 1.00E-03 | 0.97        | 0.0006                                                  | 1.60E-03 | 0.68    |
| 11                                                                       | 34461028            | cg17034036 | <i>CAT</i> <sup>FDR</sup> | Body       | 0.002  | 6.00E-04 | 0.0001  | ++++      | 0.0003                                                      | 7.78E-04 | 0.72    | -0.0001                                                 | 8.47E-04 | 0.93        | 0.0002                                                                             | 1.00E-03 | 0.82        | -0.0003                                                 | 1.20E-03 | 0.80    |
| 2                                                                        | 1482597             | cg01385533 | <i>TPO</i> <sup>FDR</sup> | Body       | -0.003 | 8.00E-04 | 0.0004  | -?--      | -0.0006                                                     | 7.31E-04 | 0.40    | -0.002                                                  | 7.87E-04 | <b>0.04</b> | -0.0018                                                                            | 8.00E-04 | <b>0.04</b> | -0.0016                                                 | 1.30E-03 | 0.22    |

Shown are top CpGs within the *CAT* and *TPO* genes from the discovery meta-analysis ordered by p-value; Estimates are presented per 10 µg/m<sup>3</sup> increase in NO<sub>2</sub> exposure.

Column headers: CHR: chromosome; Position: Chromosomal position based on NCBI human reference genome assembly Build 37. Mapped Gene: UCSC annotated gene; Gene Group: UCSC gene region feature category; regression coefficient; SE: standard error for regression coefficient; Direction: Direction of effect across cohorts included in the statistical model (MeDALL, Generation R, CHS and MoBa); NO<sub>2</sub> exposure associated with increased (+) or decreased (-) methylation, or missing (?) result.

Figure S3

A)

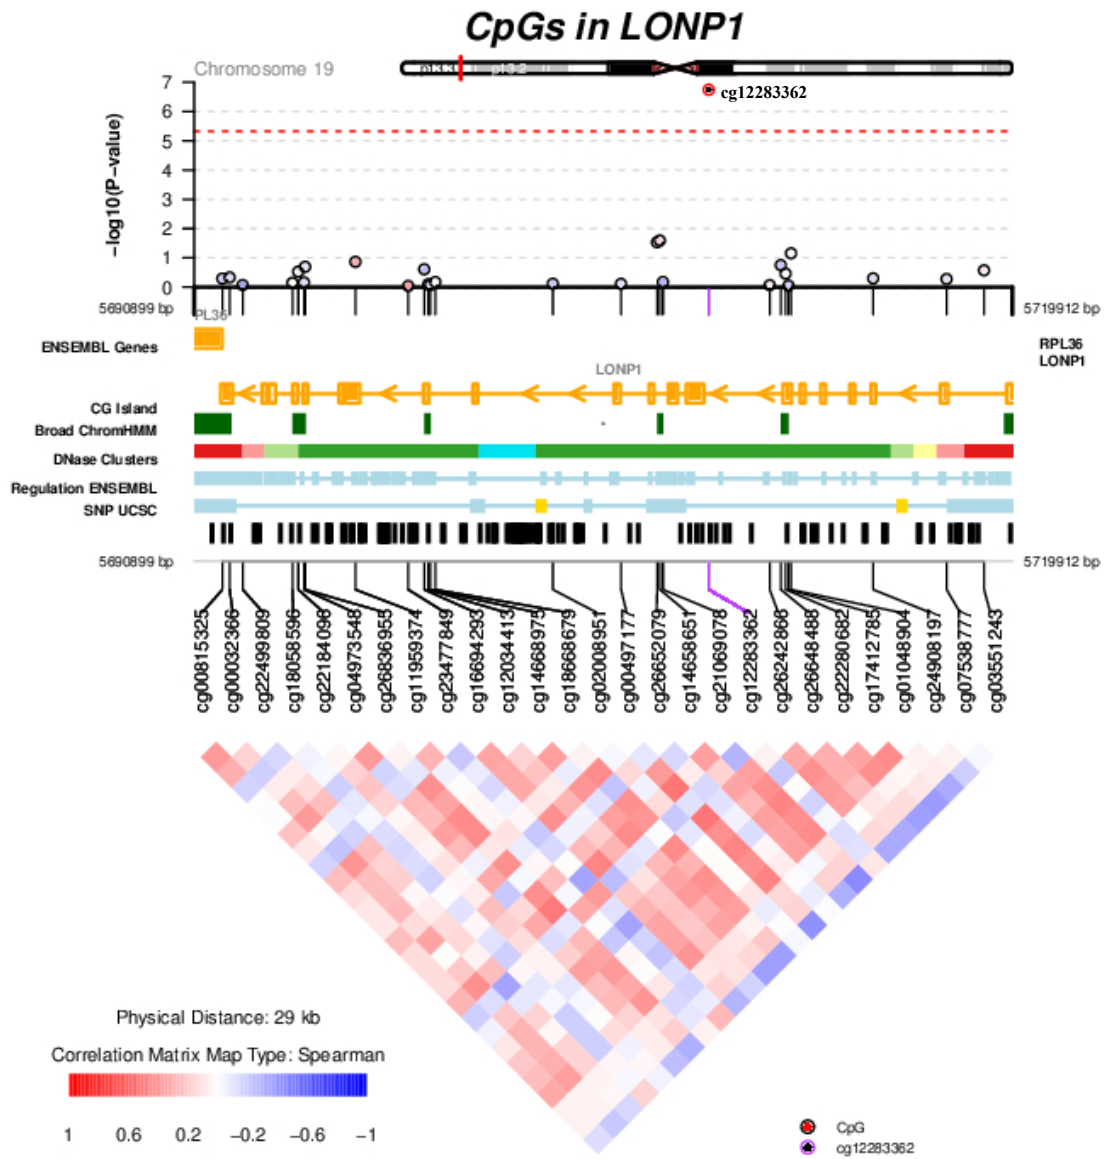

B)

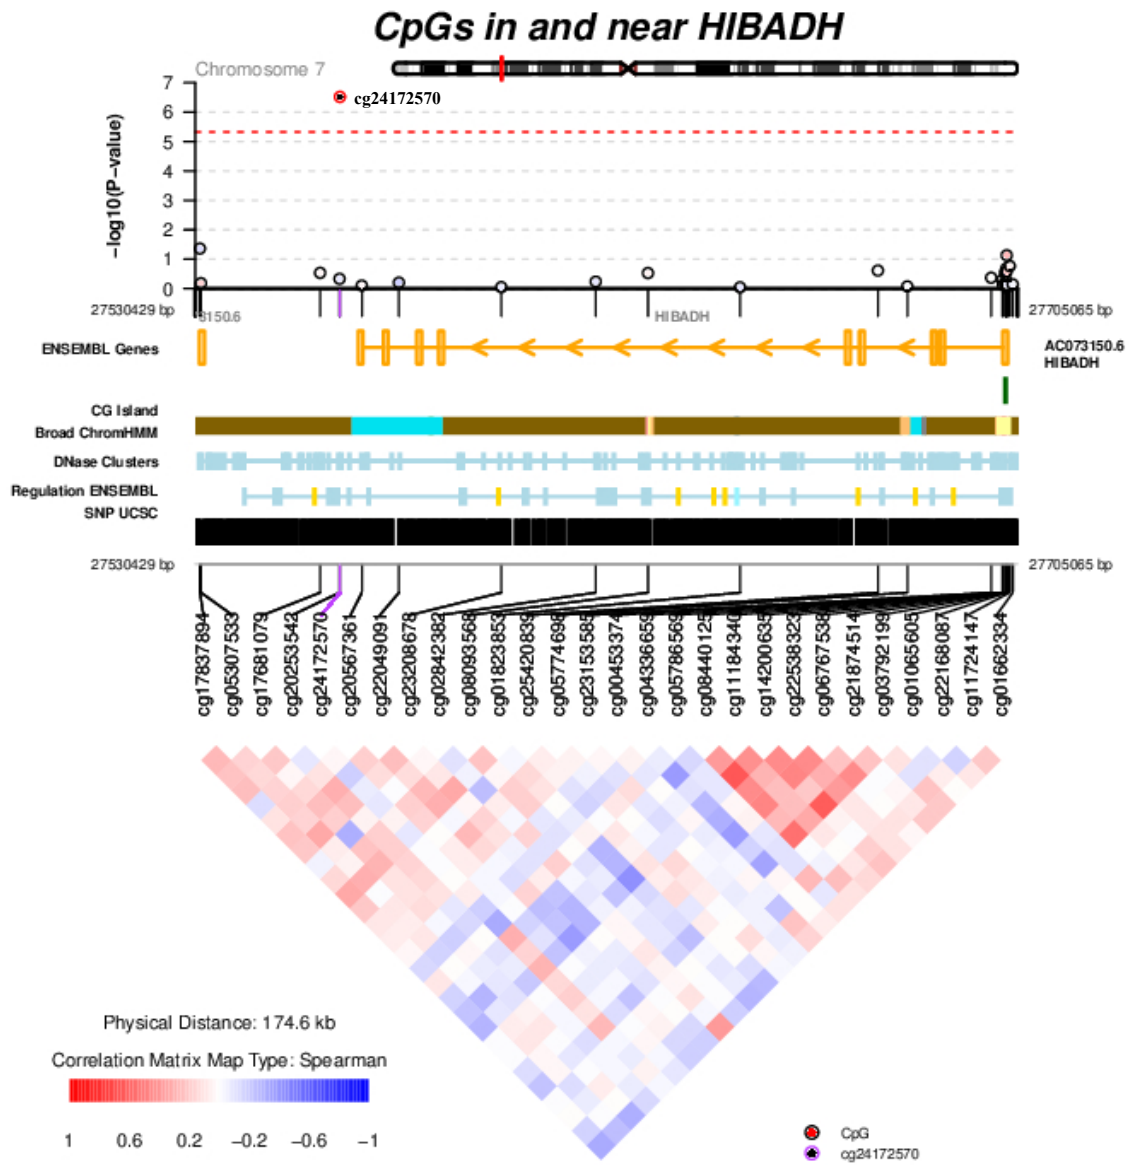



C)

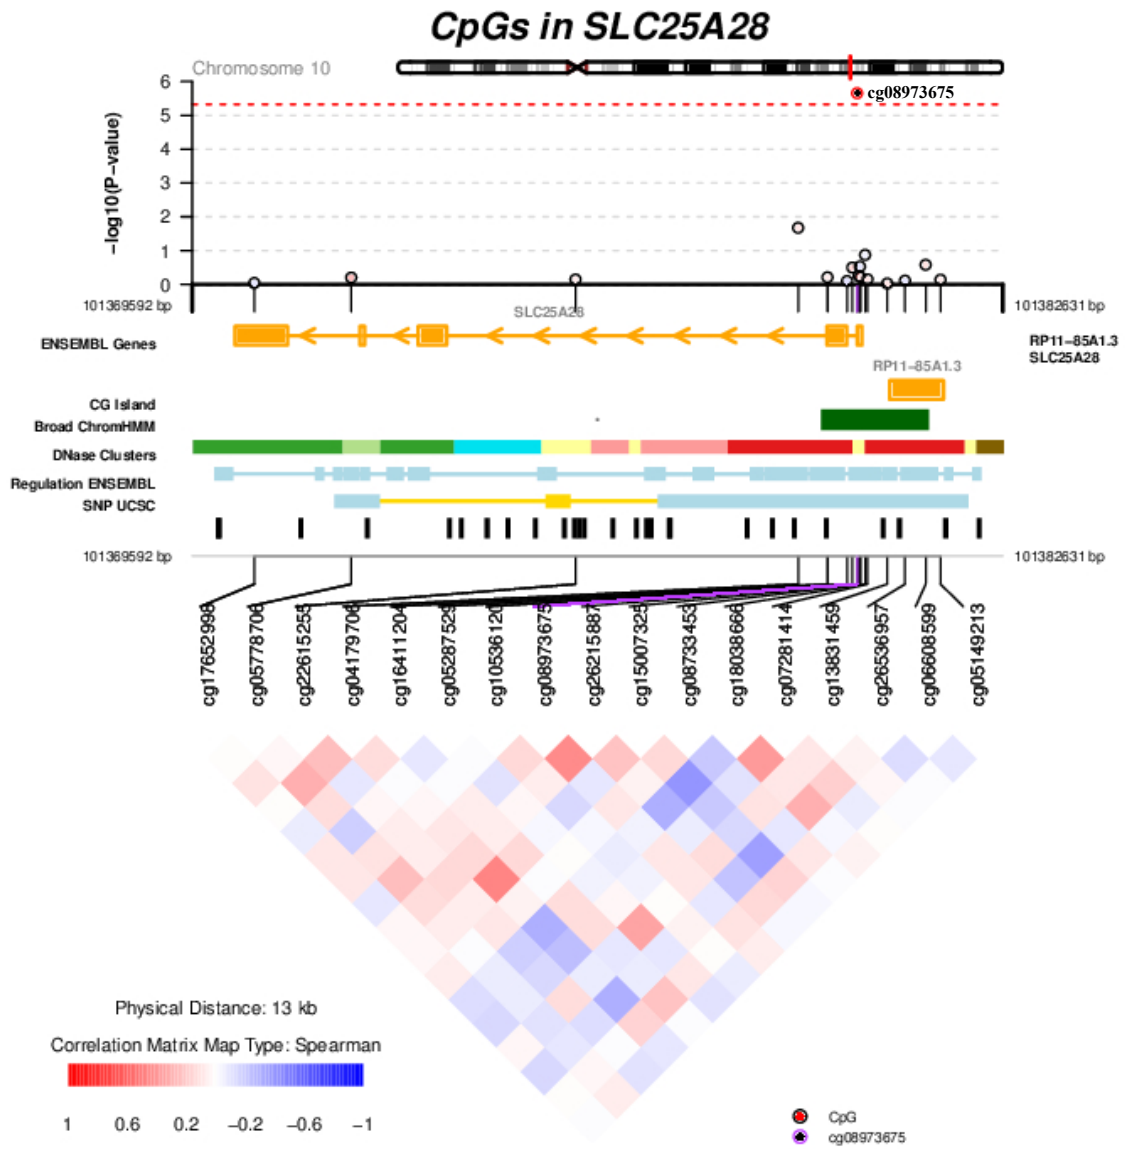

D)

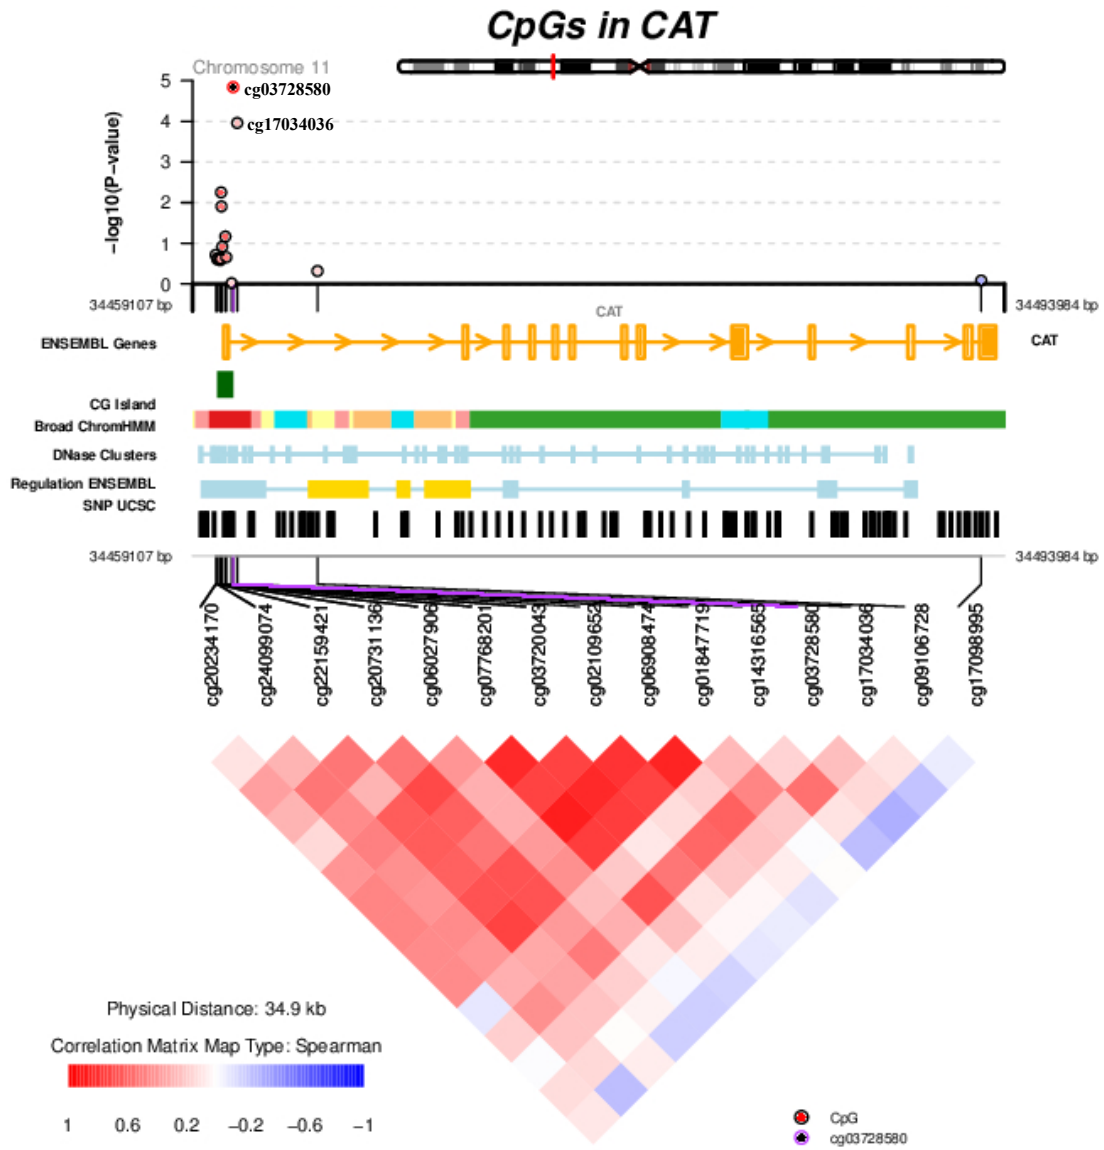

E)

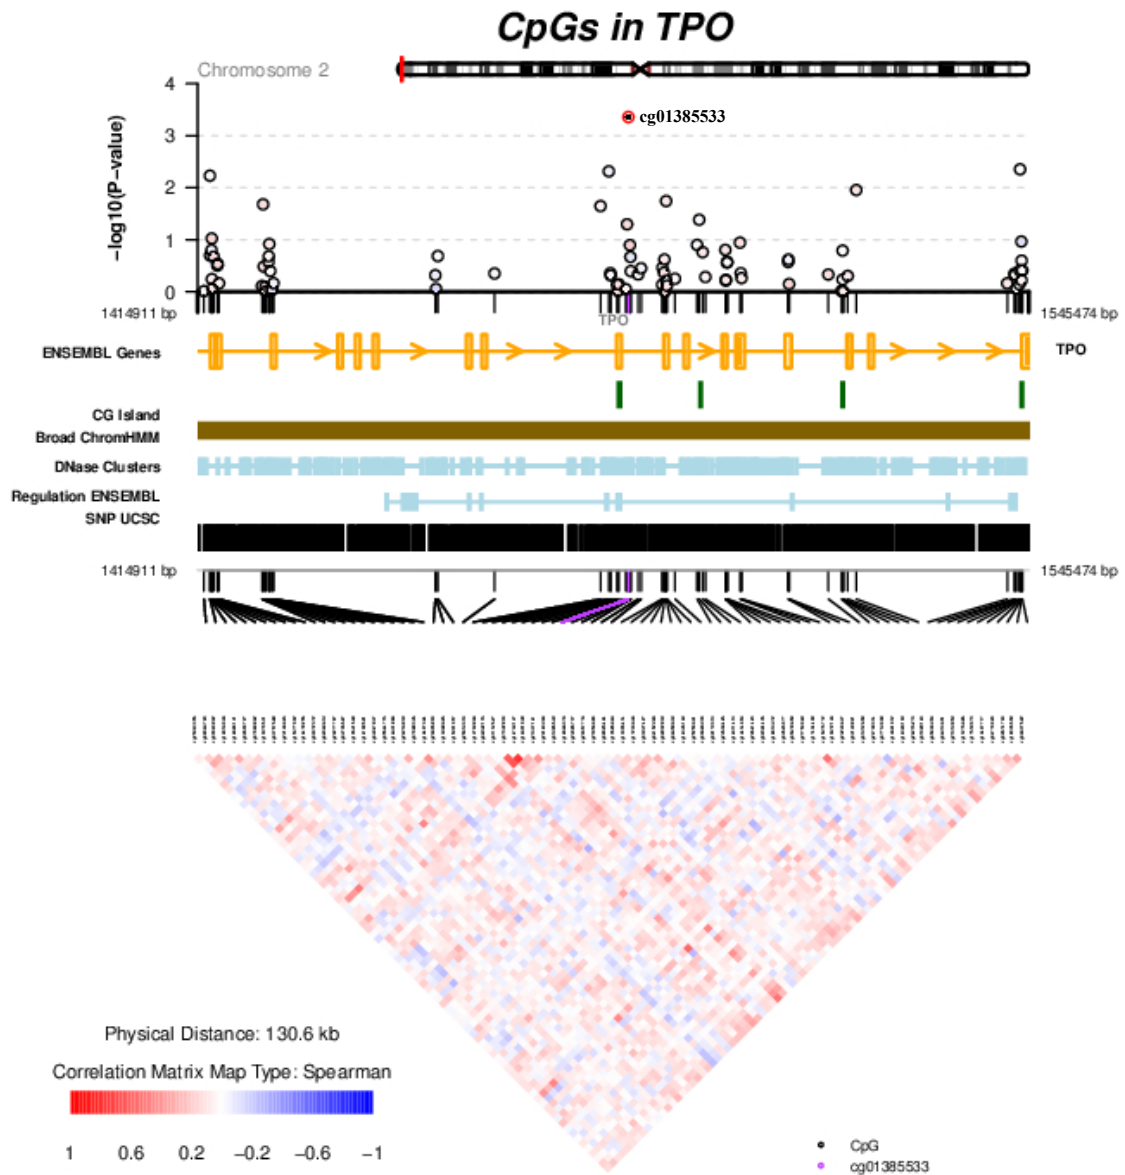

**Figure S3.** Regional plots and co-methylation patterns for the genes containing FDR-significant EWAS CpG sites (circles): A) *LONP1* (cg12283362), B) *HIBADH* (cg24172570), C) *SLC25A28* (cg08973675), as well as D) *CAT* (cg03728580 and cg17034036) and E) *TPO* (cg01385533).  $-\log_{10}(\text{p values})$  from the meta-analysis, CpGs indicated by dots, color coded based on pairwise correlation with neighboring CpGs. The lower panel demonstrate pairwise correlation matrix across the displayed CpGs.

## Acknowledgements

**INMA:** We would like thank all the families and children for their participation in the INMA study. The authors are grateful to Silvia Fochs, NuriaPey, and Muriel Ferrer, for their assistance in contacting the families and administering the questionnaires. A full roster of the INMA project investigators can be found at [http://www.proyectoinma.org/presentacion-inma/listado-investigadores/en\\_listado-investigadores.html](http://www.proyectoinma.org/presentacion-inma/listado-investigadores/en_listado-investigadores.html). DNA extractions were performed at the Spanish National Genotyping Centre (CEGEN-Barcelona).

**EDEN:** We are indebted to the midwife research assistants (L. Douhaud, S. Bedel, B. Lortholary, S. Gabriel, M. Rogeon, and M. Malinbaum) for data collection and to P. Lavoine for checking, coding, and data entry.

**BAMSE:** We would like thank all the families for their participation in the BAMSE study. In addition, we would like to thank Eva Hallner, Sara Nilsson and André Lauber at the BAMSE secretary for invaluable support, as well as Mutation Analysis Facility (MAF) at Karolinska Institutet for genome-wide methylation analysis, and Ingrid Delin for excellent technical assistance. The computations were performed on resources provided by SNIC through Uppsala Multidisciplinary Center for Advanced Computational Science (UPPMAX) under Project b2014110.

**The Generation R** Study is conducted by the Erasmus Medical Center (MC) in close collaboration with the School of Law and Faculty of Social Sciences of the Erasmus University Rotterdam, the Municipal Health Service Rotterdam area, Rotterdam, the Rotterdam Homecare Foundation, Rotterdam and the Stichting Trombosedienst & Artsenlaboratorium Rijnmond (STAR-MDC), Rotterdam. We gratefully acknowledge the contribution of children and parents, general practitioners, hospitals, midwives and pharmacies in Rotterdam. The study protocol was approved by the Medical Ethical Committee of the Erasmus MC, University Medical Centre, Rotterdam, the Netherlands. The generation and management of the Illumina 450K methylation array data (EWAS data) for the

Generation R Study was executed by the Human Genotyping Facility of the Genetic Laboratory of the Department of Internal Medicine, Erasmus MC, Erasmus University Medical Center, Rotterdam, the Netherlands. We thank Mr. Michael Verbiest, Ms. Mila Jhamai, Ms. Sarah Higgins, Mr. Marijn Verkerk and Dr. Lisette Stolk for their help in creating the EWAS database.

**MoBa**, we are grateful to all families participating in the Norwegian Mother and Child Cohort Study.

### **Funding**

The methylation study of PIAMA, BAMSE, EDEN and INMA birth cohorts was funded by MEDALL, a collaborative project supported by the European Union under the Health Cooperation Work Programme of the 7th Framework programme (grant agreement number 261357).

INMA study was funded by grants from Instituto de Salud Carlos III (Red INMA G03/176, CB06/02/0041; PI041436; PI081151 incl. FEDER funds ; MS13/00054), Generalitat de Catalunya-CIRIT 1999SGR 00241, and EU Commission (261357 and 211250).

The PIAMA study was funded by grants from the Dutch Asthma Foundation (grant 3.4.01.26, 3.2.06.022, 3.4.09.081 and 3.2.10.085CO), the ZON-MW Netherlands Organization for Health Research and Development (grant 912-03-031), the Stichting Astmabestrijding and the Ministry of the Environment.

The EDEN cohort is funded by FRM, Inserm, IReSP, Nestlé, French Ministry of Health, ANR, Univ. Paris-Sud, InVS, ANSES and MGEN.

BAMSE was supported by The Swedish Research Council, The Swedish Heart-Lung Foundation, Freemason Child House Foundation in Stockholm, MeDALL (Mechanisms of the Development of ALLergy) a collaborative project conducted within the European Union

(grant agreement No. 261357), Centre for Allergy Research, Stockholm County Council (ALF), Swedish foundation for strategic research (SSF) (RBc08-0027), the Strategic Research Programme (SFO) in Epidemiology at Karolinska Institutet, The Swedish Research Council Formas and the Swedish Environment Protection Agency.

The Generation R Study is made possible by financial support from the Erasmus Medical Center (MC), Rotterdam, the Erasmus University Rotterdam and the Netherlands Organization for Health Research and Development. V.W.V.J. received an additional grant from the Netherlands Organization for Health Research and Development (VIDI 016.136.361) and a Consolidator Grant from the European Research Council (ERC-2014-CoG-64916). L.D. received an additional grant from the Lung Foundation Netherlands (no 3.2.12.089; 2012). J.F.F. has received funding from the European Union's Horizon 2020 research and innovation programme under grant agreement No 633595 (DynaHEALTH). The EWAS data was funded by a grant to V.W.V.J. from the Netherlands Genomics Initiative (NGI)/Netherlands Organisation for Scientific Research (NWO) Netherlands Consortium for Healthy Aging (NCHA; project nr. 050-060-810), and by funds from the Genetic Laboratory of the Department of Internal Medicine, Erasmus Medical Center. The researchers are independent from the funders. The study sponsors had no role in the study design, data collection, data analysis, interpretation of data, and preparation, review or approval of the manuscript.

The CHS was supported by the following NIH grants: 5K01ES017801, 1R01ES022216, 5P30ES007048, R01ES014447, P01ES009581, R826708-01 and RD831861-01. We would like to express our sincere gratitude to Martin Kharrazi, Steve Graham and Robin Cooley at the California Biobank Program and Genetic Disease Screening Program within the California Department of Public Health for their assistance and advice regarding newborn bloodspots.

For MoBa this research was supported [in part] by the Intramural Research Program of the NIH, National Institute of Environmental Health Sciences (Z01-ES-49019). The Norwegian Mother and Child Cohort Study is supported by the Norwegian Ministry of Health and the Ministry of Education and Research, NIH/NIEHS (contract no. N01-ES-75558), NIH/NINDS (grant no.1 U01 NS 047537-01) and the Norwegian Research Council/FUGE (grant no. 151918/S10), and the present study by the Norwegian Research Council/Human Biobanks and Health (grant number 221097).

## References

- Aryee MJ, Jaffe AE, Corrada-Bravo H, et al. 2014. Minfi: A flexible and comprehensive bioconductor package for the analysis of infinium DNA methylation microarrays. *Bioinformatics* 30:1363-1369.
- Beelen R, Hoek G, Vienneau D, et al. 2013. Development of no2 and nox land use regression models for estimating air pollution exposure in 36 study areas in europe - the escape project. *Atmos Environ* 72:10-23.
- Bolstad BM, Irizarry RA, Astrand M, et al. 2003. A comparison of normalization methods for high density oligonucleotide array data based on variance and bias. *Bioinformatics* 19:185-193.
- Bousquet J, Anto J, Auffray C, et al. 2011. Medall (mechanisms of the development of allergy): An integrated approach from phenotypes to systems medicine. *Allergy* 66:596-604.
- Chen YA, Lemire M, Choufani S, et al. 2013. Discovery of cross-reactive probes and polymorphic cpgs in the illumina infinium humanmethylation450 microarray. *Epigenetics* 8:203-209.
- Guxens M, Ballester F, Espada M, et al. 2012. Cohort profile: The inma--infancia y medio ambiente--(environment and childhood) project. *Int J Epidemiol* 41:930-940.
- Hannam K, McNamee R, De Vocht F, et al. 2013. A comparison of population air pollution exposure estimation techniques with personal exposure estimates in a pregnant cohort. *Environ Sci Process Impacts* 15:1562-1572.
- Heude B, Forhan A, Slama R, et al. 2015. Cohort profile: The eden mother-child cohort on the prenatal and early postnatal determinants of child health and development. *Int J Epidemiol*.
- Jaddoe VW, van Duijn CM, Franco OH, et al. 2012. The generation r study: Design and cohort update 2012. *Eur J Epidemiol* 27:739-756.
- Joubert B, Felix J, Yousefi P, et al. 2016. DNA methylation in newborns and maternal smoking in pregnancy: Genome-wide consortium meta-analysis. *Am J Hum Genet* 98(4):680-696.
- Kruithof CJ, Kooijman MN, van Duijn CM, et al. 2014. The generation r study: Biobank update 2015. *Eur J Epidemiol* 29:911-927.



Magnus P, Irgens LM, Haug K, et al. 2006. Cohort profile: The norwegian mother and child cohort study (moba). *Int J Epidemiol* 35:1146-1150.

McConnell R, Berhane K, Yao L, et al. 2006. Traffic, susceptibility, and childhood asthma. *Environ Health Perspect* 114:766-772.

Noushmehr H, Weisenberger DJ, Diefes K, et al. 2010. Identification of a cpg island methylator phenotype that defines a distinct subgroup of glioma. *Cancer Cell* 17:510-522.

Pedersen M, Giorgis-Allemand L, Bernard C, et al. 2013. Ambient air pollution and low birthweight: A european cohort study (escape). *The lancet Respiratory medicine* 1:695-704.

Peters JM, Avol E, Gauderman WJ, et al. 1999a. A study of twelve southern california communities with differing levels and types of air pollution. Ii. Effects on pulmonary function. *Am J Respir Crit Care Med* 159:768-775.

Peters JM, Avol E, Navidi W, et al. 1999b. A study of twelve southern california communities with differing levels and types of air pollution. I. Prevalence of respiratory morbidity. *Am J Respir Crit Care Med* 159:760-767.

Pidsley R, CC YW, Volta M, et al. 2013. A data-driven approach to preprocessing illumina 450k methylation array data. *BMC Genomics* 14:293.

Rivera-Gonzalez LO, Zhang Z, Sanchez BN, et al. 2015. An assessment of air pollutant exposure methods in mexico city, mexico. *J Air Waste Manag Assoc* 65:581-591.

Ronningen KS, Paltiel L, Meltzer HM, et al. 2006. The biobank of the norwegian mother and child cohort study: A resource for the next 100 years. *Eur J Epidemiol* 21:619-625.

Thacher JD, Gruzieva O, Pershagen G, et al. 2016. Parental smoking and development of allergic sensitization from birth to adolescence. *Allergy* 71:239-248.

Touleimat N, Tost J. 2012. Complete pipeline for infinium((r)) human methylation 450k beadchip data processing using subset quantile normalization for accurate DNA methylation estimation. *Epigenomics* 4:325-341.

Triche TJ, Jr., Weisenberger DJ, Van Den Berg D, et al. 2013. Low-level processing of illumina infinium DNA methylation beadarrays. *Nucleic Acids Res* 41:e90.

Van den Hooven EH, Pierik FH, Van Ratingen SW, et al. 2012. Air pollution exposure estimation using dispersion modelling and continuous monitoring data in a prospective birth cohort study in the netherlands. *Environ Health-Glob* 11:9.

Wickman M, Kull I, Pershagen G, et al. 2002. The bamse project: Presentation of a prospective longitudinal birth cohort study. *Pediatr Allergy Immunol* 13 Suppl 15:11-13.
